# 1 **Whitening of odor representations by the wiring diagram of the olfactory bulb**

2

3 Adrian A. Wanner<sup>1,2,†</sup>, Rainer W. Friedrich<sup>1,2,\*</sup>

4

5 <sup>1</sup>Friedrich Miescher Institute for Biomedical Research, Maulbeerstrasse 66, 4058 Basel,  
6 Switzerland

7 <sup>2</sup>Faculty of Natural Sciences, University of Basel, 4003 Basel, Switzerland

8 \*Correspondence to: R. Friedrich, Friedrich Miescher Institute for Biomedical Research,  
9 Maulbeerstrasse 66, 4058 Basel, Switzerland

10 †Current address: Princeton Neuroscience Institute, Princeton University, 20 Washington Road,  
11 08544 Princeton, New Jersey, USA

12

13

14 **Neuronal computations underlying higher brain functions depend on synaptic interactions among**  
15 **specific neurons. A mechanistic understanding of such computations requires wiring diagrams of**  
16 **neuronal networks. We examined how the olfactory bulb (OB) performs ‘whitening’, a**  
17 **fundamental computation that decorrelates activity patterns and supports their classification by**  
18 **memory networks. We measured odor-evoked activity in the OB of a zebrafish larva and**  
19 **subsequently reconstructed the complete wiring diagram by volumetric electron microscopy. The**  
20 **resulting functional connectome revealed an overrepresentation of multisynaptic connectivity**  
21 **motifs that mediate reciprocal inhibition between neurons with similar tuning. This connectivity**  
22 **suppressed redundant responses and was necessary and sufficient to reproduce whitening in**  
23 **simulations. Whitening of odor representations is therefore mediated by higher-order structure in**  
24 **the wiring diagram that is adapted to natural input patterns.**

25

26 Neuronal activity patterns evoked by natural stimuli are transformed in the brain to extract relevant  
27 information. Such patterns often contain correlations and intensity variations that originate from the  
28 statistics of natural scenes and from the tuning of sensory receptors<sup>1</sup>. This statistical structure complicates  
29 the classification of sensory inputs because it does not usually reflect behaviorally relevant stimulus  
30 categories<sup>2</sup>. For example, visual scenes may be dominated by a large number of pixels representing sky  
31 while the biologically most important information is conveyed by a small subset of pixels representing  
32 specific objects (e.g., a hawk or a sparrow). Hence, correlations in sensory inputs can complicate  
33 meaningful pattern classification and object recognition. This problem can be alleviated by whitening, a  
34 fundamental transformation in signal processing that decorrelates patterns and normalizes their variance.  
35 Whitening is therefore often used early in a pattern classification process to remove undesired correlations  
36 and to optimize the use of coding space<sup>3</sup>.

37 In the visual and auditory system, whitening of individual neurons' responses to natural stimuli supports  
38 efficient coding by redundancy reduction<sup>4-7</sup>. Efficient pattern classification, however, requires whitening  
39 of activity patterns across neuronal populations. This form of whitening occurs in the olfactory bulb  
40 (OB)<sup>8-10</sup> where axons of olfactory sensory neurons expressing the same odorant receptor converge onto  
41 discrete glomeruli. Odors evoke distributed patterns of input activity across array of glomeruli that can  
42 overlap substantially when odorants share functional groups<sup>11-13</sup>. Moreover, the variance (contrast) of  
43 glomerular activity patterns varies dramatically as a function of odor concentration. As a consequence,  
44 patterns of sensory input to the OB are not well suited for concentration-invariant odor classification. The  
45 output of the OB is transmitted to higher brain areas by mitral cells, which receive sensory input from  
46 individual glomeruli and interact with other mitral cells via multisynaptic interneuron (IN) pathways  
47 (Fig. 1a). Contrary to glomerular inputs, activity patterns across mitral cells become rapidly decorrelated  
48 during the initial phase of an odor response<sup>8,14-18</sup> and their variance depends only modestly on stimulus  
49 intensity<sup>10,19</sup>. Neuronal circuits in the OB therefore decorrelate and normalize population activity patterns,

50 resulting in a whitening of odor representations that facilitates pattern classification. However, it remains  
51 unclear how this transformation is achieved by interactions between neurons in the OB network.

52 Efficient whitening can be achieved by transformations that are adapted to the correlation structure of  
53 input patterns<sup>1</sup>. Such adaptive whitening requires prior knowledge about inputs and tuning-dependent  
54 connectivity between specific cohorts of neurons. Hence, whitening of sensory representations is thought  
55 to depend on an evolutionary memory of stimulus space that is contained in the wiring diagram of  
56 neuronal circuits. This hypothesis is difficult to test in the OB because tuning and functional connectivity  
57 cannot be inferred from topographical relationships between neurons<sup>11,20-22</sup>. Moreover, because  
58 interactions between mitral cells are multisynaptic via INs, relevant inhibitory interactions cannot be  
59 visualized by transsynaptic tracing across a single synapse.

60 Adaptive whitening and other memory-based processes are likely to depend on higher-order features of  
61 neuronal connectivity that cannot be detected by sparse sampling of pairwise connectivity between  
62 individual neurons. We therefore used a “functional connectomics” approach that combines population-  
63 wide neuronal activity measurements with dense reconstructions of wiring diagrams. To achieve this goal  
64 we took advantage of the small size of the larval zebrafish brain. We first measured odor responses of  
65 neurons in the OB by multiphoton calcium imaging and subsequently reconstructed the synaptic  
66 connectivity among all neurons by serial block-face scanning electron microscopy (SBEM)<sup>23-26</sup>. We found  
67 that higher-order features of multisynaptic connectivity specifically suppress the activity of correlated  
68 mitral cell ensembles in a stimulus-dependent manner, resulting in a decorrelation and variance  
69 normalization. The wiring diagram of the OB is therefore adapted to the correlation structure of its inputs  
70 and mediates a whitening operation based on contrast reduction rather than contrast enhancement.

71

72 **Results**

## 73 **Reconstruction of the wiring diagram and mapping of neuronal activity**

74 We previously acquired an SBEM image stack of the OB in a zebrafish larva and reconstructed 98% of  
75 the neurons in the OB<sup>25,26</sup>. We now annotated the synaptic connections of all OB neurons to reconstruct  
76 the full wiring diagram. Human annotators followed each of the reconstructed skeletons and manually  
77 labeled all input and output synapses (Fig. 1b,c). Subsequently, synapses of INs were annotated a second  
78 time by different annotators. Hence, each synapse involved in MC-IN-MC connectivity motifs should  
79 have been encountered at least three times. To obtain a conservative estimate of the wiring diagram with  
80 few false positives we retained only those synapses that were annotated at least twice by independent  
81 annotators.

82 Each synapse was assigned a unitary weight so that the total connection strength between a pair of  
83 neurons equaled the number of synapses. The resulting wiring diagram contained 19,874 MC→IN  
84 synapses, 17,524 MC←IN synapses (Fig. 1d), and 13,610 synapses between INs. We also observed  
85 contact sites between MCs associated with the same glomerulus where plasma membranes showed strong  
86 staining but these sites usually lacked associated vesicles. We did therefore not consider synaptic  
87 connections between MCs. On average, connected pairs of MCs and INs made 3.1 MC→IN synapses and  
88 2.9 MC←IN synapses per pair. A hallmark of synaptic connectivity in the adult OB are reciprocal  
89 dendrodendritic synaptic connections between the same MC-IN pair. In the larval OB, 52% of MC→IN  
90 synapses and 51% of MC←IN synapses were associated with a synapse of opposite direction, usually  
91 within 2.5 μm, between the same pair of neurons (Fig. 1b, bottom). Hence, reciprocal synaptic  
92 connectivity is prominent already in the larval OB of zebrafish.

93 Prior to preparation of the OB sample for SBEM we measured neuronal activity by multiphoton imaging  
94 of the calcium indicator GCaMP5, which was expressed under the pan-neuronal *elavl3* promoter<sup>27</sup>.  
95 Somata observed in electron microscopy were mapped onto the light microscopy data using an iterative  
96 landmark-based affine alignment procedure followed by manual proofreading (Fig. 2a,b; Supplementary

97 Fig. 1). Somatic calcium signals evoked by four amino acid odors ( $10^{-4}$  M) and four bile acid odors  
98 ( $10^{-5}$  M) were measured sequentially in six optical planes (Fig. 2a; Supplementary Fig. 1) and temporally  
99 deconvolved to estimate odor-evoked firing rate changes<sup>28</sup>. The dynamics of neuronal population activity  
100 was then represented by time series of activity vectors for each odor stimulus (232 MCs and 68 INs).

101 Decorrelation and contrast normalization of activity patterns across MCs have been characterized  
102 previously in the OB of adult zebrafish<sup>8,14,15</sup> and mice<sup>16-18</sup> where >90% of neurons are GABAergic INs. In  
103 the larval OB, in contrast, INs account for only 25% of all neurons<sup>26</sup>. Most of these INs are likely to be  
104 periglomerular and short axon cells because INs with the typical morphology of granule cells appear only  
105 later in development. We therefore asked whether the core circuitry present in the larval OB already  
106 performs computations related to whitening.

107 Correlations between activity patterns evoked by different bile acids were high after stimulus onset and  
108 decreased during the subsequent few hundred milliseconds (Fig. 2d,e). Patterns evoked by amino acids, in  
109 contrast, were less correlated throughout the odor response, which was expected because most amino  
110 acids had dissimilar side chains. To quantify pattern decorrelation we focused on activity patterns evoked  
111 by bile acids and computed the mean difference in pairwise Pearson correlations between a time window  
112 shortly after response onset ( $t_1$ ) and a later time window ( $t_2$ ). Time windows were chosen such that the  
113 mean population activity across MCs was not significantly different (Fig. 2d;  $p = 0.44$ , Wilcoxon rank-  
114 sum test). Pattern correlations across MCs, however, were significantly lower at  $t_2$  than at  $t_1$  ( $p = 0.03$ ,  
115 Wilcoxon rank-sum test), demonstrating that MC activity patterns were reorganized and decorrelated.  
116 Activity across INs followed the mean MC activity with a small delay and did not exhibit an obvious  
117 decorrelation (Fig. 2d), consistent with observations in the adult OB<sup>29</sup>.

118 The contrast of MC activity patterns, as measured by the variance of activity across the population,  
119 increased shortly after stimulus onset and peaked slightly later than the pattern correlation. Subsequently,  
120 variance decreased and became more uniform across odors, as reflected by a significant decrease in the

121 standard deviation of the variance across odors between  $t_2$  and  $t_1$  (Fig. 2d;  $p < 0.01$ , Wilcoxon rank-sum  
122 test;  $t_1$  was slightly shifted relative to the time window for correlation analysis to cover the peak of the  
123 variance). Hence, MC activity patterns in the larval OB became decorrelated and contrast-normalized,  
124 consistent with the whitening of odor representations in the adult OB.

125

## 126 **Computational consequences of connectivity**

127 While contrast normalization can be achieved by global scaling operations such as divisive  
128 normalization<sup>30</sup>, pattern decorrelation requires interactions between distinct subsets of neurons<sup>9</sup>. In theory,  
129 pattern decorrelation could be achieved by large networks with sparse and random connectivity<sup>31</sup> but this  
130 architecture is inconsistent with the low number of INs in the larval OB. Smaller networks can decorrelate  
131 specific input patterns when their connectivity is specifically adapted to the structure of sensory inputs,  
132 suggesting that decorrelation in the OB is an input-specific transformation of odor representations that is  
133 encoded in the wiring diagram. In order to explore this hypothesis we first asked whether whitening can  
134 be reproduced by implementing the wiring diagram in a network of minimally complex single-neuron  
135 models (Fig. 3a).

136 We simulated a network of threshold-linear rate neurons with 208 MCs, representing all recorded MCs  
137 with input and output synapses, and 234 INs, representing all connected INs. Connections between MCs  
138 and INs were given by the wiring diagram and excitatory sensory input into MCs was given by the odor-  
139 evoked activity pattern at  $t_1$ . For simplicity, IN-IN connections were not considered. The time course of  
140 stimuli consisted of a fast initial rise followed by a slow decay<sup>31</sup>, approximating the response time course  
141 of olfactory sensory neurons in zebrafish<sup>8</sup>. Because connectivity was fixed, the final network model had  
142 only six degrees of freedom (thresholds, synaptic weight scaling factors and time constants of each  
143 neuron type).

144 Correlations between simulated population responses to bile acids increased rapidly and subsequently  
145 decreased. Consistent with experimental observations, the mean correlation decreased significantly  
146 between two time windows  $t_1$  and  $t_2$  that were chosen so that the mean activity was not significantly  
147 different (Fig. 3b,c). The variance (contrast) of activity patterns and its standard deviation across stimuli  
148 followed a similar time course but peaked slightly later than the correlation, consistent with experimental  
149 observations. Both measures decreased significantly between  $t_1$  and  $t_2$  (Fig. 3b,c;  $t_1$  was adjusted slightly  
150 to cover the peak of the variance). Hence, a minimal network implementing the reconstructed  
151 connectivity reproduced whitening of biologically realistic inputs. When connectivity was randomized,  
152 decorrelation and contrast normalization were both abolished (Fig. 4b-d). We therefore conclude that  
153 whitening depended on the wiring diagram.

154 To further confirm this conclusion we examined whether the reorganization of activity patterns  
155 underlying whitening can be predicted from connectivity without an explicit simulation of network  
156 dynamics. Activity patterns at  $t_1$  were multiplied with the feed-forward connectivity  $W_{MC \rightarrow IN}$  and  
157 thresholded to generate a hypothetical pattern of IN activity. This activity pattern was then multiplied  
158 with the feed-back connectivity  $W_{MC \leftarrow IN}$  to predict the pattern of feedback inhibition, which was  
159 subtracted from  $t_1$ . This simple algebraic procedure reproduced both pattern decorrelation and variance  
160 normalization (Fig. 3c) but failed to do so when connectivity matrices were randomized (not shown),  
161 further supporting the conclusion that the wiring diagram contains specific information essential for  
162 whitening.

163 We next performed more specific manipulations to explore how whitening depends on higher-order  
164 structure in the wiring diagram. In simulations, we first applied the same permutations to the feed-forward  
165 ( $MC \rightarrow IN$ ) and feed-back connectivity ( $MC \leftarrow IN$ ). This manipulation shuffles the off-diagonal elements  
166 in the disynaptic connectivity matrix (lateral inhibition) but preserves the overall distribution of  
167 disynaptic  $MC \rightarrow IN \rightarrow MC$  connection strengths and the on-diagonal elements (self-inhibition; Fig. 3d).

168 Similar to the full randomization of connectivity, this co-permutation abolished whitening (Fig. 3b,c).  
169 Moreover, whitening was abolished when input channels were permuted to produce novel input patterns  
170 with the same statistical properties and correlations (Fig. 3c). These results show that whitening is  
171 mediated by higher-order features of multisynaptic connectivity that are adapted to patterns of sensory  
172 input.

173

### 174 **Mechanisms of whitening**

175 The shortest path between MCs associated with different glomeruli is a disynaptic interaction via one IN  
176 (MC-IN-MC). To identify properties of the wiring diagram that mediate whitening we therefore analyzed  
177 MC-IN-MC triplets. There are nine possible triplet configurations that represent four topological motifs  
178 (Fig. 4a). We found that the motif containing no reciprocal connection (motif 1) was underrepresented  
179 whereas the other motifs were overrepresented in comparison to randomized networks (Fig 4b). The  
180 strongest overrepresentation was observed for motif 4, which contains reciprocal connections between  
181 both MCs and the IN. Hence, MC-IN-MC triplets frequently contained reciprocal connections.

182 To determine whether disynaptic connectivity between MCs depends on their tuning we constructed an  
183 input tuning curve for each MC from the responses to the eight odors at  $t_I$ . For all pairs of MCs we then  
184 quantified the Pearson correlation between their input tuning curves and the number of disynaptic MC-  
185 IN-MC connection paths across all motifs. The mean number of disynaptic connections increased with the  
186 input tuning correlation (Fig. 4c). Hence, triplets mediate interactions preferentially between MCs with  
187 similar tuning.

188 We further analyzed the relationship between triplet motifs and tuning curve similarity. Motifs with  
189 reciprocal connections (motifs 2 – 4) were significantly overrepresented among MCs with similar tuning  
190 (correlation  $>0.5$ ; Fig. 4d). This overrepresentation was most pronounced for motif 4 (all connections



191 reciprocal). Hence, disynaptic reciprocal interactions are significantly enriched between MCs with similar  
192 tuning.

193 In the retina, unidirectional lateral inhibition between functionally related neurons sharpens tuning curves  
194 and enhances pattern contrast<sup>32</sup> (Fig. 5a, left). In idealized networks with strictly reciprocal connectivity,  
195 in contrast, inhibition does not amplify asymmetries in inputs and self-inhibition is usually larger than  
196 lateral inhibition (assuming equal synaptic strength; Fig. 5a, right). Hence, reciprocal triplet connectivity  
197 among neurons with similar tuning should primarily down-regulate, rather than sharpen, the activity of  
198 connected cohorts of neurons. The computational effects of these transformations depend on the  
199 properties of input patterns (Supplementary Fig. 2). When inputs follow overlapping Gaussian  
200 distributions, contrast enhancement can decorrelate patterns because stimulus-specific information is  
201 contained in strong neuronal responses<sup>4,32</sup>. However, when activity patterns overlap primarily in strongly  
202 responsive units, contrast enhancement will fail to decorrelate patterns because it emphasizes non-specific  
203 responses. In this scenario, patterns may be decorrelated by the selective inhibition of strongly active  
204 cohorts, which may be achieved by specific reciprocal inhibition (Supplementary Fig. 2).

205 To examine the basis of pattern correlations in the OB we analyzed population activity patterns evoked by  
206 bile acids at  $t_1$ . For each pair of patterns, we quantified the contribution  $r_{i,t1}$  of MC  $i$  to the Pearson  
207 correlation  $r$ . Overall pattern correlations were dominated by high contributions from a small fraction of  
208 MCs. This subset of MCs was also strongly active, as observed directly when MCs were ranked by their  
209  $r_{i,t1}$  (Fig. 5b,c). As a corollary, these MCs also made large contributions to the variance of neuronal  
210 activity patterns at  $t_1$  (Fig. 5c). Hence, correlated odor representations overlapped primarily in strongly  
211 responsive MCs, consistent with observations in the adult OB<sup>9</sup>.

212 We then examined the changes in the activity of individual neurons underlying the decorrelation and  
213 contrast normalization between  $t_1$  and  $t_2$ . The activity of MCs with large  $r_{i,t1}$  was significantly lower at  $t_2$   
214 than at  $t_1$  (Fig. 5b,c). The activity of MCs that did not strongly contribute to the initial correlation, in

215 contrast, remained similar. As a consequence, the contribution of MCs with large  $r_{i,t1}$  to the overall  
216 correlation decreased, resulting in a substantial decorrelation of population activity patterns between  $t_1$   
217 and  $t_2$ . Pattern decorrelation can therefore be attributed, at least in part, to the selective inhibition of MC  
218 cohorts that dominate the initial pattern correlations. MCs with high  $r_{i,t1}$  also made strong contributions to  
219 pattern variance at  $t_1$  (Fig. 5c) because their activity was substantially higher than the population mean.  
220 The selective inhibition of these cohorts between  $t_1$  and  $t_2$  changed the activity of these MCs towards the  
221 population mean and therefore decreased pattern variance and its s.d. across odors. Pattern decorrelation  
222 and contrast normalization can therefore be attributed to a common mechanism that targets inhibition to  
223 specific MC cohorts and results in contrast reduction rather than contrast enhancement.

224 The selective suppression of activity in cohorts of co-responsive MCs requires inhibition within cohorts  
225 to be stronger than the mean inhibition across the population. To explore how such stimulus- and  
226 ensemble-specific inhibition can arise from the connectivity between neurons we selected the 10 MCs  
227 with the highest  $r_{i,t1}$  for each pair of bile acid stimuli. We then determined the disynaptic MC inputs to  
228 these cohorts by retrograde tracing through the wiring diagram across two synapses. Inputs to MCs within  
229 a cohort were strongly biased towards MCs of the same cohort (Fig. 5d,e), implying that neurons in a  
230 cohort will be strongly inhibited when the cohort is activated as a whole. The specific suppression of  
231 activity underlying whitening can therefore be explained by dense reciprocal connectivity within cohorts,  
232 which suppresses the representation of stimulus features that activate a cohort.

233 To further explore this hypothesis we continued to analyze the mechanism of whitening in simulations.  
234 We first ranked simulated MCs by their  $r_{i,t1}$  for bile acid-evoked activity patterns in experiments (same  
235 ranking as in Fig. 5c). As observed experimentally, simulated MCs with large  $r_{i,t1}$  were strongly inhibited  
236 between  $t_1$  and  $t_2$  while the mean activity of other MCs remained unchanged (Fig. 6a). Simulations  
237 therefore recapitulated the mechanism of whitening in the OB and precisely predicted the underlying  
238 activity changes in individual neurons.

239 We then selected the 10 MCs with the highest  $r_{i,t1}$  for each pair of bile acid stimuli (19 MCs in total) and  
240 deleted their feedforward connections onto INs in the simulation (11% of all MC→IN connections;  
241 Fig. 6b, left). As a control, we deleted the same fraction of feedforward connections between random  
242 subsets of neurons. While random deletions had almost no effect, the selective disconnection of functional  
243 cohorts abolished pattern decorrelation and variance normalization (Fig. 6c,d). Ranking of MCs by their  
244  $r_{i,t1}$  in experimental data demonstrated that the activity of MCs with high  $r_{i,t1}$  was reduced slightly  
245 between  $t_1$  and  $t_2$  when MC cohorts were selectively disconnected but not as effectively as under control  
246 conditions. As a consequence, these MCs continued to make large positive contributions to pattern  
247 correlation and variance at  $t_2$  (Fig. 6e). These results show that the selective disconnection of functional  
248 cohorts abolished whitening because it disrupted feature suppression. We next randomized all  
249 connections except those of the 10 MCs with the highest  $r_{i,t1}$  for each bile acid pair (Fig. 6b, right).  
250 Results were compared to the full randomization of the wiring diagram, which reduced the inhibition of  
251 MC cohorts and abolished whitening (Fig. 3b,c). When connections of functional MC cohorts were  
252 selectively preserved, however, the inhibition of MC cohorts remained strong and pattern decorrelation  
253 was restored (Fig. 6c,d). Variance normalization was only partially rescued, presumably because  
254 preserved cohorts were selected only for their contribution to correlations between bile acid pairs and not  
255 for amino acids. The activity of MCs with high  $r_{i,t1}$  was strongly reduced (Fig. 6e), demonstrating that  
256 pattern decorrelation and partial variance normalization were the result of feature suppression. These  
257 results confirm that whitening is mediated by specific disynaptic interactions that suppress the activity of  
258 correlation-promoting MC cohorts.

259

## 260 **Discussion**

261 We used a functional connectomics approach in a small vertebrate to explore the mechanism of whitening  
262 in the OB. Whitening is a computation related to object classification and associative memory that

263 requires specific transformations of defined neuronal activity patterns. Such computations are thought to  
264 rely on specific wiring diagrams that are adapted to relevant inputs. Consistent with this notion, we found  
265 that whitening is achieved by specific multisynaptic interactions that cannot be described by general  
266 topographic principles or by the first-order statistics of connectivity between neuron types. Functional  
267 connectomics is therefore a promising approach to dissect distributed, memory-based computations  
268 underlying higher brain functions.

269 Correlations between input patterns in the OB were dominated by distinct subsets of strongly active input  
270 channels. This correlation structure is likely to reflect the co-activation of different odorant receptors by  
271 discrete functional groups<sup>12,13</sup> and implies that input correlations cannot be removed efficiently by  
272 contrast enhancement<sup>33-35</sup>. Rather, patterns are decorrelated by the selective inhibition of strongly active,  
273 correlation-promoting MC cohorts. Pattern decorrelation is therefore achieved by contrast reduction,  
274 rather than contrast enhancement, which also supports contrast normalization.

275 Whitening requires specific tuning-dependent, disynaptic MC-IN-MC connectivity that may be  
276 established by molecular or activity-dependent mechanisms. Because this connectivity exists already  
277 before activity-dependent effects were detected on the morphological development of glomeruli<sup>36</sup> the  
278 initial assembly of neuronal connections may rely primarily on molecular cues. Projections of INs are  
279 enriched between glomeruli that receive input from odorant receptors of the same families<sup>26</sup>, raising the  
280 possibility that glomerular targeting of sensory neurons<sup>37</sup> and INs involve related mechanisms. However,  
281 the development of the connectivity that mediates whitening remains to be explored.

282 Lateral inhibition between neurons with similar tuning is often assumed to sharpen tuning curves by  
283 amplifying asymmetries in the input. In the OB, however, triplet connections between related MCs are  
284 highly enriched in reciprocal connections. This connectivity results in feedback inhibition that is  
285 independent of the precise pattern of MC input to a cohort (Fig. 5a, right) and down-scales the activity of  
286 neuronal cohorts without amplifying asymmetries in the input. Reciprocally connected  $MC \leftrightarrow IN \leftrightarrow MC$

287 cohorts therefore mediate feature suppression: in the presence of a feature that effectively activates a  
288 cohort, the inhibitory feedback gain within the cohort will be larger than the mean feedback gain and  
289 suppress the representation of the feature. This mechanism can explain the selective and odor-dependent  
290 inhibition of correlation-promoting MC cohorts.

291 Functional connectomics permitted us to test the significance of this mechanism by implementing the  
292 wiring diagram in a network of minimally complex model neurons. Simulations demonstrated that higher-  
293 order features of connectivity were necessary and sufficient to produce whitening. Precisely targeted  
294 manipulations confirmed that whitening was the result of feature suppression by reciprocal  
295  $MC \leftrightarrow IN \leftrightarrow MC$  connectivity among correlation-promoting MC cohorts. Whitening in the OB is therefore  
296 produced by a network mechanism that differs from canonical computations in the retina and other  
297 sensory systems, presumably because the statistics of sensory inputs differ between sensory modalities.

298 In visual cortex, functionally related principal neurons make stronger excitatory connections than random  
299 subsets of neurons<sup>38</sup>. Such connectivity can arise from Hebbian plasticity mechanisms, enhance  
300 representations of sensory features, and amplify specific inputs in memory networks after learning. The  
301 disynaptic connectivity observed in the OB, in contrast, results in inhibitory interactions between  
302 functionally related principal neurons. Such connectivity cannot be achieved by monosynaptic  
303 connectivity between MCs because inhibitory synapses between MCs would violate Dale's law.  
304 Functional connectivity in the OB is therefore similar in structure, but opposite in sign, to excitatory  
305 connectivity motifs in visual cortex. As a consequence, the connectivity in the OB suppresses, rather than  
306 amplifies, specific features in the input. Such a mechanism appears useful to attenuate the impact of  
307 irrelevant sensory inputs and to reduce undesired correlations. The mechanism of whitening by feature  
308 suppression is consistent with networks that have been optimized for whitening in a theoretical  
309 framework with biologically plausible constraints<sup>39,40</sup>. Hence, the mechanism of whitening observed in  
310 the OB may represent a general computational strategy in the brain.

311

312 **References**

- 313 1 Simoncelli, E. P. & Olshausen, B. A. Natural image statistics and neural representation. *Annu Rev*  
314 *Neurosci* **24**, 1193-1216 (2001).
- 315 2 DiCarlo, J. J., Zoccolan, D. & Rust, N. C. How does the brain solve visual object recognition?  
316 *Neuron* **73**, 415-434 (2012).
- 317 3 Bishop, C. M. *Neural networks for pattern recognition*. (Clarendon Press, Oxford, 1995).
- 318 4 Barlow, H. B. in *Sensory communication* (ed W. A. Rosenblith) 217-234 (MIT Press, 1961).
- 319 5 Atick, J. J. & Redlich, A. N. Convergent algorithm for sensory receptive-field development. *Neural*  
320 *Comput.* **5**, 45-60 (1993).
- 321 6 Olshausen, B. A. & Field, D. J. Emergence of simple-cell receptive field properties by learning a  
322 sparse code for natural images. *Nature* **381**, 607-609 (1996).
- 323 7 Smith, E. C. & Lewicki, M. S. Efficient auditory coding. *Nature* **439**, 978-982 (2006).
- 324 8 Friedrich, R. W. & Laurent, G. Dynamic optimization of odor representations in the olfactory  
325 bulb by slow temporal patterning of mitral cell activity. *Science* **291**, 889-894 (2001).
- 326 9 Friedrich, R. W. & Wiechert, M. T. Neuronal circuits and computations: pattern decorrelation in  
327 the olfactory bulb. *FEBS letters* **588**, 2504-2513 (2014).
- 328 10 Zhu, P., Frank, T. & Friedrich, R. W. Equalization of odor representations by a network of  
329 electrically coupled inhibitory interneurons. *Nature Neurosci.* **16**, 1678-1686 (2013).
- 330 11 Friedrich, R. W. & Korsching, S. I. Combinatorial and chemotopic odorant coding in the zebrafish  
331 olfactory bulb visualized by optical imaging. *Neuron* **18**, 737-752 (1997).
- 332 12 Araneda, R. C., Kini, A. D. & Firestein, S. The molecular receptive range of an odorant receptor.  
333 *Nature Neurosci* **3**, 1248-1255 (2000).
- 334 13 Mori, K., Takahashi, Y. K., Igarashi, K. M. & Yamaguchi, M. Maps of odorant molecular features in  
335 the mammalian olfactory bulb. *Physiol. Rev.* **86**, 409-433 (2006).
- 336 14 Friedrich, R. W., Habermann, C. J. & Laurent, G. Multiplexing using synchrony in the zebrafish  
337 olfactory bulb. *Nat. Neurosci.* **7**, 862-871 (2004).
- 338 15 Niessing, J. & Friedrich, R. W. Olfactory pattern classification by discrete neuronal network  
339 states. *Nature* **465**, 47-52 (2010).
- 340 16 Gschwend, O. *et al.* Neuronal pattern separation in the olfactory bulb improves odor  
341 discrimination learning. *Nat Neurosci* **18**, 1474-1482 (2015).
- 342 17 Chu, M. W., Li, W. L. & Komiyama, T. Balancing the Robustness and Efficiency of Odor  
343 Representations during Learning. *Neuron* **92**, 174-186 (2016).
- 344 18 Yamada, Y. *et al.* Context- and Output Layer-Dependent Long-Term Ensemble Plasticity in a  
345 Sensory Circuit. *Neuron* **93**, 1198-1212 e1195 (2017).
- 346 19 Banerjee, A. *et al.* An Interglomerular Circuit Gates Glomerular Output and Implements Gain  
347 Control in the Mouse Olfactory Bulb. *Neuron* **87**, 193-207 (2015).
- 348 20 Willhite, D. C. *et al.* Viral tracing identifies distributed columnar organization in the olfactory  
349 bulb. *Proc. Natl. Acad. Sci. USA* **103**, 12592-12597 (2006).
- 350 21 Fantana, A. L., Soucy, E. R. & Meister, M. Rat olfactory bulb mitral cells receive sparse  
351 glomerular inputs. *Neuron* **59**, 802-814 (2008).
- 352 22 Soucy, E. R., Albeanu, D. F., Fantana, A. L., Murthy, V. N. & Meister, M. Precision and diversity in  
353 an odor map on the olfactory bulb. *Nat. Neurosci.* **12**, 210-220 (2009).
- 354 23 Denk, W. & Horstmann, H. Serial block-face scanning electron microscopy to reconstruct three-  
355 dimensional tissue nanostructure. *PLoS Biol* **2**, e329 (2004).
- 356 24 Denk, W., Briggman, K. L. & Helmstaedter, M. Structural neurobiology: missing link to a  
357 mechanistic understanding of neural computation. *Nat Rev Neurosci* **13**, 351-358 (2012).

- 358 25 Wanner, A. A., Genoud, C. & Friedrich, R. W. 3-dimensional electron microscopic imaging of the  
359 zebrafish olfactory bulb and dense reconstruction of neurons. *Scientific data* **3**, 160100 (2016).
- 360 26 Wanner, A. A., Genoud, C., Masudi, T., Siksou, L. & Friedrich, R. W. Dense EM-based  
361 reconstruction of the interglomerular projectome in the zebrafish olfactory bulb. *Nat Neurosci*  
362 **19**, 816-825 (2016).
- 363 27 Akerboom, J. *et al.* Genetically encoded calcium indicators for multi-color neural activity imaging  
364 and combination with optogenetics. *Frontiers in molecular neuroscience* **6**, 2 (2013).
- 365 28 Yaksi, E. & Friedrich, R. W. Reconstruction of firing rate changes across neuronal populations by  
366 temporally deconvolved Ca<sup>2+</sup> imaging. *Nature Methods* **3**, 377-383 (2006).
- 367 29 Yaksi, E., Judkewitz, B. & Friedrich, R. W. Topological reorganization of odor representations in  
368 the olfactory bulb. *PLoS Biol.* **5**, e178 (2007).
- 369 30 Carandini, M. & Heeger, D. J. Normalization as a canonical neural computation. *Nat. Rev.*  
370 *Neurosci.* **13**, 51-62 (2011).
- 371 31 Wiechert, M. T., Judkewitz, B., Riecke, H. & Friedrich, R. W. Mechanisms of pattern decorrelation  
372 by recurrent neuronal circuits. *Nature Neurosci.* **13**, 1003-1010 (2010).
- 373 32 Hartline, H. K. & Ratliff, F. Inhibitory interaction of receptor units in the eye of *Limulus*. *J. gen.*  
374 *Physiol.* **40**, 357-376 (1957).
- 375 33 Yokoi, M., Mori, K. & Nakanishi, S. Refinement of odor molecule tuning by dendrodendritic  
376 synaptic inhibition in the olfactory bulb. *Proc. Natl. Acad. Sci. USA* **92**, 3371-3375 (1995).
- 377 34 Cleland, T. A. & Sethupathy, P. Non-topographical contrast enhancement in the olfactory bulb.  
378 *BMC Neurosci.* **7**, 7 (2006).
- 379 35 Arevian, A. C., Kapoor, V. & Urban, N. N. Activity-dependent gating of lateral inhibition in the  
380 mouse olfactory bulb. *Nat. Neurosci.* **11**, 80-87 (2008).
- 381 36 Braubach, O. R. *et al.* Experience-dependent versus experience-independent postembryonic  
382 development of distinct groups of zebrafish olfactory glomeruli. *J Neurosci* **33**, 6905-6916  
383 (2013).
- 384 37 Nishizumi, H. & Sakano, H. Developmental regulation of neural map formation in the mouse  
385 olfactory system. *Developmental neurobiology* **75**, 594-607 (2015).
- 386 38 Ko, H. *et al.* Functional specificity of local synaptic connections in neocortical networks. *Nature*  
387 **473**, 87-91 (2011).
- 388 39 Pehlevan, C. & Chklovskii, D. B. in *2015 53rd Annual Allerton Conference on Communication,*  
389 *Control, and Computing (Allerton)*. 1458-1465.
- 390 40 Zung, J. & Seung, S. A correlation game for unsupervised learning yields computational  
391 interpretations of Hebbian excitation, anti-Hebbian inhibition, and synapse elimination. *arXiv*,  
392 arXiv:1704.00646v00641 (2017).
- 393 41 Kinkhabwala, A. *et al.* A structural and functional ground plan for neurons in the hindbrain of  
394 zebrafish. *Proc Natl Acad Sci U S A* **108**, 1164-1169 (2011).
- 395 42 Akerboom, J. *et al.* Optimization of a GCaMP calcium indicator for neural activity imaging. *J*  
396 *Neurosci* **32**, 13819-13840 (2012).
- 397 43 Westerfield, M. *The zebrafish book. A guide for the laboratory use of zebrafish (Danio rerio)*. 4  
398 edn, (University of Oregon Press, 2000).
- 399 44 Li, J. *et al.* Early development of functional spatial maps in the zebrafish olfactory bulb. *J.*  
400 *Neurosci.* **25**, 5784-5795 (2005).
- 401 45 Brustein, E., Marandi, N., Kovalchuk, Y., Drapeau, P. & Konnerth, A. "In vivo" monitoring of  
402 neuronal network activity in zebrafish by two-photon Ca<sup>2+</sup> imaging. *Pflügers Arch* **446**, 766-773  
403 (2003).
- 404 46 Tabor, R., Yaksi, E., Weislogel, J. M. & Friedrich, R. W. Processing of odor mixtures in the  
405 zebrafish olfactory bulb. *J. Neurosci.* **24**, 6611-6620 (2004).



- 406 47 Zhu, P., Fajardo, O., Shum, J., Zhang Schäerer, Y.-P. & Friedrich, R. W. High-resolution optical  
407 control of spatiotemporal neuronal activity patterns in zebrafish using a digital micromirror  
408 device. *Nat. Protoc.* **7**, 1410-1425 (2012).
- 409 48 Pologruto, T. A., Sabatini, B. L. & Svoboda, K. ScanImage: flexible software for operating laser  
410 scanning microscopes. *BioMed. Eng. OnLine* **2**, 13 (2003).
- 411 49 Suter, B. A. *et al.* Ephus: multipurpose data acquisition software for neuroscience experiments.  
412 *Front. Neural Circuits* **4**, 100 (2010).
- 413 50 Keller, P. J., Schmidt, A. D., Wittbrodt, J. & Stelzer, E. H. Digital scanned laser light-sheet  
414 fluorescence microscopy (DSLM) of zebrafish and Drosophila embryonic development. *Cold*  
415 *Spring Harbor protocols* **2011**, 1235-1243 (2011).
- 416 51 Deerinck, T. J. *et al.* Enhancing serial block-face scanning electron microscopy to enable high  
417 resolution 3D nanohistology of cells and tissues. *Microsc. Microanal.* **16**, 1138-1139 (2010).
- 418 52 Tapia, J. C. *et al.* High-contrast en bloc staining of neuronal tissue for field emission scanning  
419 electron microscopy. *Nat Protoc* **7**, 193-206 (2012).
- 420 53 Pinching, A. J. & Powell, T. P. The neuropil of the glomeruli of the olfactory bulb. *J. Cell. Sci.* **9**,  
421 347-377 (1971).
- 422 54 Korogod, N., Petersen, C. C. & Knott, G. W. Ultrastructural analysis of adult mouse neocortex  
423 comparing aldehyde perfusion with cryo fixation. *eLife* **4**, 10.7554/eLife.05793 (2015).

424

425 **Acknowledgements** We thank B. Hu, A. Lüthi, P. Rupprecht and N. Temiz for comments on the  
426 manuscript and the Friedrich group for valuable discussions. C. Genoud made outstanding contributions  
427 to the acquisition of electron microscopy data. This work was supported by the Novartis Research  
428 Foundation, the Human Frontiers Science Program (HFSP; rgp0015/2010), and the Swiss National  
429 Science Foundation (SNF; CRSII3\_130470/1, 310030B\_152833).

430 **Author contributions** A.A.W. participated in all tasks. He analyzed image data, annotated synapses,  
431 supervised human annotators, analyzed data, and wrote the manuscript. R.W.F. analyzed data and wrote  
432 the manuscript.

433 **Data availability** EM data are available under <http://doi.org/10.7281/T1MS3QN7>. Other data are  
434 available from the corresponding author upon request.

435

436



437 **Figure Legends**

438 **Fig. 1 | Neuronal organization and computations in the OB.** **a**, Schematic illustration of whitening in  
439 the OB. Top: correlated input patterns with different variance. Bottom: decorrelated output patterns with  
440 similar variance. Center: Highly simplified illustration of the OB circuit. MCs receive excitatory input  
441 from a single glomerulus and interact via inhibitory INs. Whitening requires multisynaptic interactions  
442 between specific subsets of MCs that are mediated by INs and defined by the wiring diagram. **b**, Example  
443 of a reciprocal synapse between a MC and an IN. **c**, Reconstructions of a MC (left) and an IN (right).  
444 Gray volumes show glomeruli, dots depict synapses, colors denote synapse class (unidirectional non-  
445 sensory input [blue], unidirectional output [red], reciprocal [magenta], input from sensory neurons  
446 [green]). **d**, Simplified representation of the wiring diagram between MCs and INs (binarized connection  
447 strength). Colored matrix elements show MC→IN synapses (blue), MC←IN synapses (orange), and  
448 reciprocal synapses (black).

449 **Fig. 2 | Odor-evoked population activity in the OB.** **a**, Mapping of the six optical image planes selected  
450 for calcium imaging onto the EM-based reconstructions of neurons. Thickness of planes shows range of  
451 range of drift between trials. **b**, One optical image plane showing raw GCaMP5 fluorescence (left) and the  
452 corresponding oblique slice through the EM image stack (right). Dashed line outlines ipsilateral brain  
453 hemisphere; continuous white outlines show glomerular neuropil. Tel, telencephalon; OB, olfactory bulb.  
454 Region outlined by the red square is enlarged; white dots depict somata in corresponding locations.  
455 Bottom left: fluorescence change evoked by an odor stimulus in the same field of view. Arrowheads  
456 depict locations of two responsive somata in different images. **c**, Activity of MCs ( $n = 232$ ) and INs  
457 ( $n = 68$ ) in response to four bile acids (BAs) and four amino acids (AAs) during two time windows,  $t_1$  and  
458  $t_2$ . **d**, Left: time courses of odor-evoked activity, pattern correlation (Pearson) and pattern variance.  
459 Horizontal bar indicates time of odor stimulation. Black: mean measures across MCs. Gray: individual  
460 odors (variance) or odor pairs (correlation). Light blue: mean measures across INs. Correlation was  
461 measured only between activity patterns evoked by bile acids because patterns evoked by amino acids  
462 were dissimilar already at response onset. Right: Mean measures for MCs during  $t_1$  and  $t_2$ . **e**, Matrices  
463 showing Pearson correlations between activity patterns across MCs (left) and INs (right) at  $t_1$  and  $t_2$ .  
464 Odors: TCA, taurocholic acid; GCA, glycocholic acid; GCDCA, glycochenodeoxycholic acid; TDCA,  
465 taurodeoxycholic acid; Trp, tryptophan; Phe, phenylalanine; Val, valine; Lys, lysine.

466 **Fig. 3 | Whitening depends on connectivity.** **a**, Architecture of simulated network with connections  
467 between MCs and INs. **b**, Time courses of simulated odor-evoked activity, pattern correlation and pattern  
468 variance obtained with different wiring diagrams. Blue: original wiring diagram obtained by circuit

469 reconstruction. Dark red: fully randomized connectivity. Light red: co-permutation of feed-forward  
470 (MC→IN) and feed-back (MC←IN) connectivity. Shaded areas show s.d. across different permutations.  
471 **c**, Mean pattern correlation and s.d. of pattern variance at  $t_2$ . S.d. of pattern variance is normalized to the  
472 value observed experimentally at  $t_1$ . Horizontal black lines show mean experimental values at  $t_1$ .  
473 Statistical comparisons of correlation and s.d. of variance were performed using a Mann-Whitney U test  
474 and an F-test, respectively. For experimental results and simulations using the reconstructed wiring  
475 diagram error bars show s.d. across odor pairs (correlation; bile acids only) or individual odors (s.d. of  
476 variance). Significance tests compare values at  $t_2$  to experimental values at  $t_1$ . For other simulation results,  
477 error bars show s.d. over 20 repetitions. Significance tests compare the mean over repetitions to the mean  
478 observed experimentally at  $t_1$ . \*,  $p < 0.05$ ; \*\*,  $p < 0.01$ ; \*\*\*,  $p < 0.001$ ; n.s., not significant. **d**, Top:  
479 disynaptic connectivity matrix between MCs ( $W_{MC \rightarrow IN} * W_{MC \leftarrow IN}$ ). Grayscale represents number of  
480 disynaptic MC-IN-MC connections (normalized). Bottom: example of a disynaptic connectivity matrix  
481 with the same order of MCs after co-permuting  $W_{MC \rightarrow IN}$  and  $W_{MC \leftarrow IN}$ .

482 **Fig. 4 | Tuning-dependent disynaptic connectivity in the OB.** **a**, Classes of triplet connectivity motifs  
483 between MCs and INs. **b**, Left: number of connectivity motifs found in the wiring diagram (considering  
484 only MCs with activity measurements;  $n = 232$ ). Right: z-score quantifying over- or under-representation  
485 of motifs as compared to 10,000 independent randomizations. **c**, Number of disynaptic connections  
486 between MCs as a function of tuning similarity (signal correlation; binned; mean  $\pm$  s.e.m.). Black: all  
487 MCs ( $n = 21,528$  pairs); gray: excluding MCs without at least one strong odor response ( $n = 7,875$  pairs).  
488 **d**, Over- and under-representation of connectivity motifs among MC pairs with high signal correlation  
489 ( $r_{\text{Signal}} > 0.5$ ; black) and among the remaining pairs ( $r_{\text{Signal}} \leq 0.5$ ; gray).

490 **Fig. 5 | Disynaptic connectivity underlying feature suppression.** **a**, Schematic illustration of contrast  
491 enhancement by unidirectional lateral inhibition (left) and down-scaling of cohort activity by reciprocal  
492 inhibition (right; feature suppression). Arrow length and grayscale indicate activity. **b**, Example of MC  
493 activity patterns evoked by two bile acids (TCA, GCDCA) that were decorrelated between  $t_1$  and  $t_2$ . MCs  
494 are ranked from top to bottom by their individual contribution to the pattern correlation  $r$  at  $t_1$  ( $r_{i,t1}$ ). **c**,  
495 Left: average contribution of MCs to all pairwise correlations between activity patterns evoked by bile  
496 acids at  $t_1$  and  $t_2$ . MCs were ranked by  $r_{i,t1}$  for each pair of patterns as in **b**. Sorted vectors of correlation  
497 contributions were then averaged over odor pairs. Center, right: Mean bile-acid evoked activity of MCs  
498 and mean contribution of MCs to pattern variance. MCs were sorted by  $r_{i,t1}$  and averaged as in the left  
499 panel. Gray and black curves show correlation contribution, activity, and variance contribution at  $t_1$  and  $t_2$ ,  
500 respectively (same sorting of individual neurons by  $r_{i,t1}$  for all curves). Insets enlarge the top part of the

501 curves (20 MCs with highest  $r_{i,t1}$ ). **d**, Example of disynaptic retrograde tracing of functional cohorts in the  
502 wiring diagram. Blue: three MCs with highest  $r_{i,t1}$  for the odor pair shown in **b** (“starter MCs”). Green: 12  
503 INs with largest number of synaptic inputs to the starter MCs. Red: 48 MCs with largest number of  
504 disynaptic inputs to the starter MCs. Transparency represents the number of synaptic connections. Note  
505 that the MCs with strong disynaptic connectivity to the starter MCs include the starter MCs themselves,  
506 consistent with pronounced reciprocal connectivity among functionally related MC cohorts. **e**, Disynaptic  
507 MC-IN-MC connectivity as a function of correlation contribution at  $t_1$  ( $r_{i,t1}$ ; same ranking as in **b** and **c**).  
508 For each pair of bile acids, the 10 MCs with the highest  $r_{i,t1}$  were selected as starter cells. Disynaptic  
509 inputs from all MCs were then represented in a vector and averaged over odor pairs. Note strong  
510 overrepresentation of disynaptic connectivity within the cohort of starter cells (gray shading).

511 **Fig. 6 | Mechanism of whitening analyzed by targeted manipulations of the wiring diagram.** **a**, Mean  
512 correlation contribution, activity, and variance contribution of MCs responding to bile acids at  $t_1$  (light  
513 blue) and  $t_2$  (dark blue) in simulations. MCs were ranked by the correlation contribution  $r_{i,t1}$  observed in  
514 experimental data as in Fig. 5b. Insets enlarge the top parts of the curves (20 MCs with highest  $r_{i,t1}$ ) and  
515 compare simulation results to experimental data (gray, black) for the same 20 MCs. **b**, Schematic:  
516 selective deletion and selective preservation MC cohort connectivity in simulations. **c**, Mean pattern  
517 correlation and s.d. of pattern variance (normalized) at  $t_2$  observed in simulations under different  
518 conditions. S.d. of pattern variance has been normalized to the experimentally observed value at  $t_1$ .  
519 Horizontal black lines show mean values at  $t_1$ ; vertical bars show change relative to  $t_1$ . Statistical  
520 comparisons of correlation and s.d. of variance were performed using a Mann-Whitney test and an F-test,  
521 respectively. Error bars for original wiring diagram show s.d. across odor pairs (correlation; bile acids  
522 only) or individual odors (s.d. of variance); significance tests compare values at  $t_2$  to experimental values  
523 at  $t_1$ . Other error bars show s.d. over means from 20 simulations and significance tests compare the mean  
524 over repetitions to the mean observed experimentally at  $t_1$ . \*\*,  $p < 0.01$ ; \*\*\*,  $p < 0.001$ ; 0.05,  $p = 0.05$ ;  
525 n.s., not significant. **d**, Time courses of pattern correlation and of the s.d. of pattern variance in  
526 simulations using different wiring diagrams. Shaded area shows s.d. across different permutations. **e**,  
527 Mean correlation contribution, activity, and variance contribution of the 20 MCs with the highest  $r_{i,t1}$   
528 observed experimentally and in simulations using different wiring diagrams. MCs were ranked by  $r_{i,t1}$   
529 observed in experimental data as in **a** and in Fig. 5c (same ranking under all conditions). Gray:  $t_1$ ;  
530 Colored:  $t_2$ . Shading shows s.d. across 20 different permutations. Note that the reduction in correlation  
531 contribution, activity and variance contribution among MCs with high  $r_{i,t1}$  is decreased when connectivity  
532 is modified globally or in functional cohorts, but not when connectivity of functional cohorts is preserved.

533 **Supplementary Fig. 1 | Mapping of datasets and activity measurements. a**, Displacement of regions  
534 of interest (ROIs) during manual proofreading. ROIs representing somata were mapped from the EM  
535 dataset to optical image planes in each trial by an affine transformation that was determined by an  
536 iterative landmark-based procedure (Methods). Subsequently, the position of each ROI was adjusted  
537 manually on the optical image ( $n = 7,280$  ROIs; six image planes with 11 trials each). The mean  
538 displacement ( $\pm$  s.d.) during manual adjustment (proofreading) was small ( $593 \pm 833$  nm), implying that  
539 automated mapping was highly reliable. **b**, Raw calcium signals ( $\Delta F/F$ ) evoked by eight odors in neurons  
540 that were present in all trials (208 MCs and 68 INs). Gray bars indicate odor stimulation.

541 **Supplementary Fig. 2 | Effects of pattern transformations on pattern correlation. a**, Effect of  
542 contrast enhancement on the correlation between displaced Gaussian patterns. In such patterns, strongly  
543 active units convey stimulus-specific information while weakly active units tend to be non-specific.  
544 Contrast enhancement therefore decorrelates patterns because it emphasizes strongly active units and  
545 suppresses weakly active units. **b**, Effect of contrast enhancement on the correlation between activity  
546 pattern that overlap in strongly active units. Contrast enhancement fails to decorrelate patterns because  
547 pattern-specific information is conveyed by moderately or weakly active units. **c**, Patterns that overlap in  
548 strongly active units are decorrelated by selective inhibition of strongly active units, which results in  
549 contrast reduction. Patterns are decorrelated because the relative contribution of moderately or weakly  
550 active units is enhanced. Selective inhibition of strongly active units is generated by dense reciprocal  
551 inhibition within cohorts of co-tuned neurons. Inhibitory feedback gain is therefore higher than the  
552 average inhibitory feedback gain within a co-tuned cohort when the stimulus feature that activates the  
553 cohort is present (feature suppression).

554 **Methods**

555 **Animals and preparation.** Adult zebrafish (*Danio rerio*) were maintained and bred under standard  
556 conditions at 26.5°C. Embryos and larvae of a double-transgenic line  
557 (*elavl3:GCaMP5 x vglut:DsRed*)<sup>41,42</sup> in nacre background were raised at 28.5°C in standard E3 medium<sup>43</sup>.  
558 Imaging experiments were performed as described previously<sup>44</sup>. In brief, larvae 4 - 5 days post  
559 fertilization (dpf) were contained in a small drop of aerated E3 without methylene blue or N-  
560 phenylthiourea. Larvae were then paralyzed by addition of 20 µl of fresh mivacurium chloride (Mivacron,  
561 GlaxoSmithKline, Munich, Germany)<sup>45</sup> and embedded in 2% low-melting agarose (type VII; Sigma, St  
562 Louis, MO, USA) in a perfusion chamber that was inclined by 30° to improve dorsal optical access to the  
563 OBs. Agarose covering the noses was carefully removed. A constant stream of E3 (2 ml/min) was  
564 delivered through a tube in front of the nose and removed by continuous suction. Throughout the  
565 experiment it was ensured that larvae showed normal heartbeat. Larvae that were not fixed for EM  
566 recovered from paralysis after a few hours and continued to develop without obvious defects. All animal  
567 procedures were performed in accordance with official animal care guidelines and approved by the  
568 Veterinary Department of the Canton of Basel-Stadt (Switzerland).

569 **Odor stimulation.** Odor application was performed as described<sup>44</sup>. In brief, odors were delivered to the  
570 nose through the E3 medium using a computer-controlled, pneumatically actuated HPLC injection valve  
571 (Rheodyne, Rohnert Park, CA, USA). All experiments were carried out at room temperature (~22°C). The  
572 odor set comprised one food odor<sup>46</sup>, four bile acids (glycochenodeoxycholic acid [GCDCA], taurocholic  
573 acid [TCA], taurodeoxycholic acid [TDCA] and glycocholic acid [GCA]; Sigma Aldrich, Munich,  
574 Germany) and four amino acids (Trp, Lys, Phe, and Val; Fluka, Neu-Ulm, Germany). Stock solutions of  
575 GCDCA, TCA, TDCA, Trp, Lys, Phe and Val at  $5 \times 10^{-3}$  M in E3 were kept refrigerated and diluted  
576 1:500 (GCDCA, TCA, TDCA) or 1 : 50 (Trp, Lys, Phe, Val) in aerated E3 medium immediately before  
577 the experiment. A stock solution of GCA was prepared in 50% ethanol/50% E3 at  $2.5 \times 10^{-3}$  M,

578 refrigerated, and diluted 1:250 immediately before the experiment. In a given trial, an odor was applied  
579 twice for a duration of ~3 s with an inter-stimulus interval of 60 s. Successive trials with different odors  
580 were separated by at least 2 min.

581 **Multiphoton calcium imaging.** Multiphoton imaging was performed using a microscope equipped with a  
582 mode-locked Ti:sapphire laser (SpectraPhysics) and a 20× objective (NA 1.0, Zeiss) as described<sup>47</sup>.  
583 GCaMP5 was excited at 910 nm and emission was detected through green ( $535 \pm 25$  nm) and red  
584 ( $610 \pm 37.5$  nm) emission filters in separate channels. Images ( $256 \times 256$  pixels) were acquired at 128 ms  
585 per frame using SCANIMAGE and EPHUS software<sup>48,49</sup> for a total of 2 min in each trial. Trials were  
586 performed sequentially in six focal planes that were separated by approximately 10  $\mu\text{m}$  along the dorso-  
587 ventral axis of the OB. The field of view covered the entire cross-section of the OB and parts of the  
588 adjacent telencephalon. Ten stimulus trials (nine odors and one E3 control), each including two odor  
589 applications, were performed in each focal plane. The order of stimuli was E3, food, GCDCA, TCA,  
590 TDCA, GCA, Trp, Lys, Phe, Val. In addition, 2 min of spontaneous activity were recorded in each focal  
591 plane. After completion of all trials a stack of images covering the whole olfactory bulb was acquired  
592 with a z-step interval of 0.5  $\mu\text{m}$ .

593 **Automated drift correction.** Slow mechanical drift, which may be caused by capillary forces acting on  
594 the agarose matrix<sup>50</sup>, was corrected for by an automated routine. This routine acquired a small stack  
595 ( $\pm 3$   $\mu\text{m}$  around the focus; 0.5  $\mu\text{m}$  steps) and compared images to a reference by cross-correlation after  
596 standardizing image columns and rows. The field of view was then automatically translated in X,Y and Z  
597 to maximize the cross-correlation to the reference.

598 **Electron microscopy.** Preparation and imaging of this sample have been described previously (Wanner et  
599 al. 2016a, Wanner et al. 2016b). Briefly, tissue was stained *en bloc* with osmium, uranyl acetate and lead  
600 aspartate using an established protocol<sup>51,52</sup> with minor modifications and embedded in Epon resin with  
601 silver particles to minimize charging<sup>25,26</sup>. Multi-tile images were acquired in high vacuum using a

602 scanning electron microscope (QuantaFEG 200; FEI) equipped with an automated ultramicrotome inside  
603 the vacuum chamber (3View; Gatan). Section thickness was 25 nm, pixel size was  $9.25 \times 9.25 \text{ nm}^2$ , and  
604 the electron dose was  $17.5 \text{ e}^- \text{ nm}^{-2}$ . The dataset comprised 4,746 successive sections of which one section  
605 was lost due to technical problems. The final stack was cropped to a size of  $72.2 \times 107.8 \times 118.6 \text{ } \mu\text{m}^3$ .

606 **Neuron reconstruction and synapse annotation.** Skeletons of all neurons in the OB were reconstructed  
607 previously as described<sup>25,26</sup>. Briefly, three independent skeletons of each neuron were generated manually  
608 from seed points at somata. Skeletons were converged and mismatches were corrected as described, and  
609 high accuracy was verified by measures of precision and recall<sup>26</sup>. Tracing was performed using  
610 KNOSSOS ([www.knossostool.org](http://www.knossostool.org)) or PyKNOSSOS (<https://github.com/adwanner/PyKNOSSOS>). Most  
611 skeletons were generated by a professional high-throughput image annotation service ([www.ariadne.ai](http://www.ariadne.ai)).

612 Synapses were annotated manually using PyKNOSSOS in “flight” mode<sup>25</sup>. In the default configuration,  
613 PyKNOSSOS displays image data in four viewports: the YX viewport (imaging plane) and three mutually  
614 orthogonal viewports of arbitrary orientation. In “flight” mode, the latter is perpendicular to the direction  
615 of the current neurite. We found that this “auto-orthogonal” view increases tracing speed and facilitates  
616 the identification of branch points and synapses. Annotators followed skeletonized reference neurons  
617 along pre-calculated paths to ensure that all neurites were annotated. Most synapses were annotated by a  
618 professional image annotation service ([www.ariadne.ai](http://www.ariadne.ai)).

619 Synapses were identified by a cloud of vesicles that touched the plasma membrane, often at a site of  
620 intense staining. Annotators defined synapses by placing three nodes: (1) a node in the presynapse, (2) a  
621 node in the synaptic cleft, and (3) a node in the postsynapse. Nodes in the presynapse and postsynapse are  
622 skeleton nodes of the pre- and postsynaptic neurons if these skeletons are available. In addition,  
623 annotators assigned a confidence level  $c$  to each synapse. This confidence level was introduced because  
624 synapse identification is not unambiguous; rather, human experts can disagree whether a given structure  
625 is a synapse or not even when image quality is high.



626 Synapses were then classified as either “input synapse”, “output synapse”, “sensory synapse” or  
627 “unknown”. Input and output synapses are synapses of the reference neuron with the corresponding  
628 directions, excluding synapses with sensory neurons. Sensory synapses are input synapses received by the  
629 reference neuron from axons of sensory neurons, which were identified by their dark cytoplasm<sup>53</sup>.  
630 Unknown structures resemble synapses but do not display all characteristic features. These structures  
631 often included an intense staining of the membrane but no clearly associated vesicle cloud. We therefore  
632 speculate that some of these structures may be gap junctions.

633 We first annotated input and output synapses of all MCs and INs independently of each other. Hence,  
634 each synapse should have been encountered twice, once from the presynaptic and once from the  
635 postsynaptic side. Synapses of INs were then annotated again by different individuals, resulting in a 3-  
636 fold redundancy for each MC-IN synapse. In order to minimize the number of false positives the final  
637 wiring diagram retained only those MC-IN synapses that were annotated on the MC and at least once on  
638 the IN.

639 Each synapse was assigned a unitary weight. As a consequence, the strength of the connection between  
640 two neurons in each direction was given by the number of synapses between this pair of neurons. In  
641 addition, we tested two other methods to determine synaptic strength. First, connection strength was  
642 binarized such that all connections had strengths 0 or 1, independent of the number of synapses. Second,  
643 we defined the weight of a synapse as its mean confidence level  $c$ , and the total weight of a connection as  
644 the sum of the confidence levels of all synapses. In addition, we tested various confidence thresholds to  
645 discard synapses with low confidence before determining the weights. Similar results were obtained with  
646 all methods and a wide range of confidence thresholds, implying that results are highly robust.

647 **Correlation between multiphoton and SBEM image stacks.** Mapping of multiphoton to SBEM image  
648 data may be complicated by (1) mechanical distortions introduced by the sample preparation procedure,  
649 (2) shrinkage due to loss of extracellular space induced by chemical fixation<sup>54</sup>, and (3) developmental



650 changes occurring during the approximately three hours between the first calcium imaging trial and the  
651 final fixation of the tissue. Initial observations indicated that distortions between image datasets were  
652 mostly linear (rotation, translation, shrinkage) while non-linear distortions appeared minimal and  
653 developmental changes were negligible. We therefore used an affine transformation to map multiphoton  
654 images into the SBEM stack, followed by manual fine adjustment of regions of interest (ROIs) for the  
655 extraction of calcium signals.

656 An initial affine transformation matrix was fitted to a set of corresponding points that were selected  
657 manually in both datasets. The EM volume was then transformed onto the two-photon images, the  
658 position of existing points were optimized manually, and additional pairs of corresponding points were  
659 selected. The transform was then re-calculated based on the updated set of landmarks and this procedure  
660 was iterated until asymptotic behavior was observed.

661 All somata of the OB were outlined manually in the SBEM dataset and mapped onto the time-averaged  
662 multiphoton fluorescence images of each trial, resulting in 7280 mappings of somatic outlines in the  
663 SBEM dataset to regions of interest (ROIs) in 66 multiphoton images (11 trials at each of six optical  
664 planes). The position of all ROIs was then manually adjusted to optimize the mapping in each trial. The  
665 average displacement of ROIs during manual adjustment was small ( $593 \pm 833$  nm; mean  $\pm$  s.d.;  
666 Supplementary Fig. 1), demonstrating that the accuracy of the initial affine mapping was already high.

667 **Analysis of calcium signals.** Individual frames of multiphoton image time series were low-pass spatially  
668 filtered with a mild 2D Gaussian kernel ( $\sigma = 1.2$  pixels). Baseline fluorescence  $F$  was calculated as the  
669 average fluorescence during a 2 s window before response onset. Traces representing relative changes in  
670 fluorescence ( $\Delta F/F$ ) in each ROI were averaged over the two successive odor applications in each trial  
671 and band-pass filtered in time using a Butterworth filter with a cutoff frequency of 0.2 times the frame  
672 rate. The average population response onset ( $t = 0$ ) was determined manually from all raw  $\Delta F/F$  traces  
673 and fixed for all trials. Firing rate changes of neurons represented by individual ROIs were estimated by

674 temporal deconvolution of calcium signals as described<sup>28</sup> using standard parameters ( $\tau_{\text{decay}} = 3$  s,  
675  $\text{thr}_{\text{noise}} = 0$ ).

676 Analyses of population activity were restricted to neurons represented by ROIs with a radius  $\geq 2$  pixels in  
677 all trials (corresponding to an area of  $3.14 \mu\text{m}^2$ ; 232 MCs and 68 INs). For network simulations and  
678 mechanistic analyses of whitening we considered only the 208 MCs that were pre- and post-synaptic to at  
679 least one IN and excluded 24 presumably premature MCs. Population responses to different odors were  
680 compared by calculating the Pearson correlation coefficient between the population activity vectors of  
681 MCs for the different stimuli at a given time point after response onset.

682 **Network modeling.** Excitatory MCs and inhibitory INs were simulated as threshold-linear units with a  
683 state variable representing firing rate. The  $r^i(t)$  and  $u^j(t)$  representing firing rates of MC  $i$  and IN  $j$ ,  
684 respectively, followed the equations of motion

$$685 \quad \tau_{MC}^i \cdot \frac{dr^i(t)}{dt} = -r^i(t) + G_{sen}^i S^i(t) - G_{inh}^i W_{MC \leftarrow IN} \cdot [u(t) - \theta_{IN}]_+$$

$$686 \quad \tau_{IN}^j \cdot \frac{du^j(t)}{dt} = -u^j(t) + G_{exc}^j W_{IN \leftarrow MC} \cdot [r(t) - \theta_{MC}]_+$$

687 where the vectors  $r$ ,  $\theta_{MC}$  and  $\theta_{IN}$  are firing thresholds,  $W_{MC \leftarrow IN}$  and  $W_{IN \leftarrow MC}$  correspond to the  
688 reconstructed IN-to-MC and MC-to-IN connectivity weight matrices, respectively, and the vectors  $r(t)$   
689 and  $u(t)$  represent the firing rates of the MC and IN, respectively.  $[\ ]_+$  denotes half-wave rectification:

$$690 \quad [x(t)]_+ = \begin{cases} 0, & x(t) < 0 \\ x(t), & x(t) \geq 0 \end{cases}$$

691  $\tau_{MC}^i$  and  $\tau_{IN}^j$  are the time constants for the individual MCs and INs, respectively.  $G_{sen}^i$ ,  $G_{inh}^i$  and  $G_{exc}^j$  are  
692 the individual scaling factor for sensory, inhibitory and excitatory input, respectively. To account for the  
693 natural variability in biological systems, the parameter values for each of the cells in each of the

694 individual simulation runs were drawn from a Gaussian distribution with a standard deviation of 1% of  
695 the distribution mean. The distribution means of the different parameters were:

696  $G_{\text{sen}} = 2.5, G_{\text{exc}} = 3.25, G_{\text{inh}} = 5.5, \theta_{MC} = 3.6, \theta_{IN} = 110, \tau_{MC} = 1, \tau_{IN} = 250;$

697 The time course of sensory input  $S^i(t)$  was modelled as difference of exponentials as described  
698 previously<sup>31</sup>:

699  $\tilde{s}(t) = -a_{j,\infty} + \frac{a_{j,\infty}}{1-\alpha} (1 - e^{-\tau_r t} - \alpha + \alpha e^{-\tau_d t})$  with  $\alpha = 0.8, \tau_r = 1/150, \tau_d = 1/600, a_{j,\infty} = 1/150$

700 To model  $S_i(t)$ , the individual sensory input of MC  $i$ , we used its experimentally measured activity  
701  $\hat{a}_i$  during  $t_i$  and modulated the time course according to  $\tilde{s}(t)$ :

702  $S_i(t) = \hat{a}_i \frac{\tilde{s}(t)}{\tilde{s}_{\max}}$ , where  $\tilde{s}_{\max} = \max_{t \geq 0}(\tilde{s}(t))$

703 The differential equations were solved in MATLAB with a fixed step size of 1 millisecond using a first  
704 degree Newton-Cotes integration scheme or using an adaptive step size embedded Runge-Kutta-Fehlberg  
705 (4, 5) scheme. Both integration schemes lead to qualitatively very similar results, and therefore the former  
706 method was used for simplicity for the simulated data shown here.

707 In an iterative, semi-automated parameter search, we identified a suitable parameter range that fulfilled  
708 the following criteria:

709 (1) The peak firing rates of individual neurons does not exceed a physiologically realistic range (< 200  
710 Hz).

711 (2) The strength of inhibition is appropriate to reproduce the time course of the average population  
712 activity, correlation and variance.

713 (3) The activity, correlation contribution and variance contribution of individual MCs at  $t_1$  and  $t_2$  is in  
714 good correspondence to experimental measurements.

715 Parameters for which these criteria were fulfilled were found by parameter variations in pilot studies.  
716 Results were usually robust against variations of each parameter by  $\pm 50\%$  around the values reported  
717 above.

718 **Analysis of triplet motifs.** Occurrences of disynaptic MC-IN-MC motifs were counted after binarizing  
719 connections. We enumerated all neuron triplet combinations in the reconstructed wiring diagram and  
720 tested for graph isomorphism against all 4 disynaptic motif types. The obtained motif counts were  
721 compared against a reference model where the forward and backward connectivity of the MCs were  
722 permuted independently while maintaining the node count and edge density ( $n = 10\,000$  permutations).  
723 The z-scores and p-values were obtained by computing the mean and standard deviation of each motif  
724 type in the permuted networks.

725 To compare the motif frequency as a function of the pairwise tuning similarity, we divided the MC pairs  
726 into two groups, one with similar tuning ( $r_{\text{signal}} > 0.5$ ) and one with dissimilar tuning ( $r_{\text{signal}} \leq 0.5$ ) and  
727 counted the occurrences of MC-IN-MC motifs in each group. We then compared the motif counts against  
728 a reference model where we permuted the pairwise tuning similarity between MCs and regrouped them  
729 by tuning similarity ( $r_{\text{signal}} > 0.5$  versus  $r_{\text{signal}} \leq 0.5$ ) while maintaining the same network topology  
730 ( $n = 10\,000$  permutations). The z-scores and p-values were then obtained by computing the mean and  
731 standard deviation of each motif type in the permuted groups (Fig 4d).

732 **Additional analyses.** The contribution of individual MCs to the Pearson correlation coefficient

733

$$r = \frac{1}{n-1} \sum_{i=1}^n \left( \frac{x_i - \bar{x}}{sd_x} \right) \left( \frac{y_i - \bar{y}}{sd_y} \right)$$

734 between population activity patterns was calculated by determining the summand  $\left(\frac{x_i - \bar{x}}{sd_x}\right)\left(\frac{y_i - \bar{y}}{sd_y}\right)$  for each

735 MC. Similarly, the contribution of individual MCs to the variance

736 
$$sd_x^2 = \frac{1}{n-1} \sum_{i=1}^n (x_i - \bar{x})^2$$

737 of the population activity patterns was calculated by determining the summand  $(x_i - \bar{x})^2$  for each MC.

738 Here,  $x_i$  and  $y_i$  are responses of MCs to odors x and y,  $sd_x$  and  $sd_y$  are the standard deviations of

739 population responses to odors x and y, and n is the total number of MCs in the population.

740 Statistical significance was tested using a non-parametric Mann-Whitney U test unless noted otherwise.

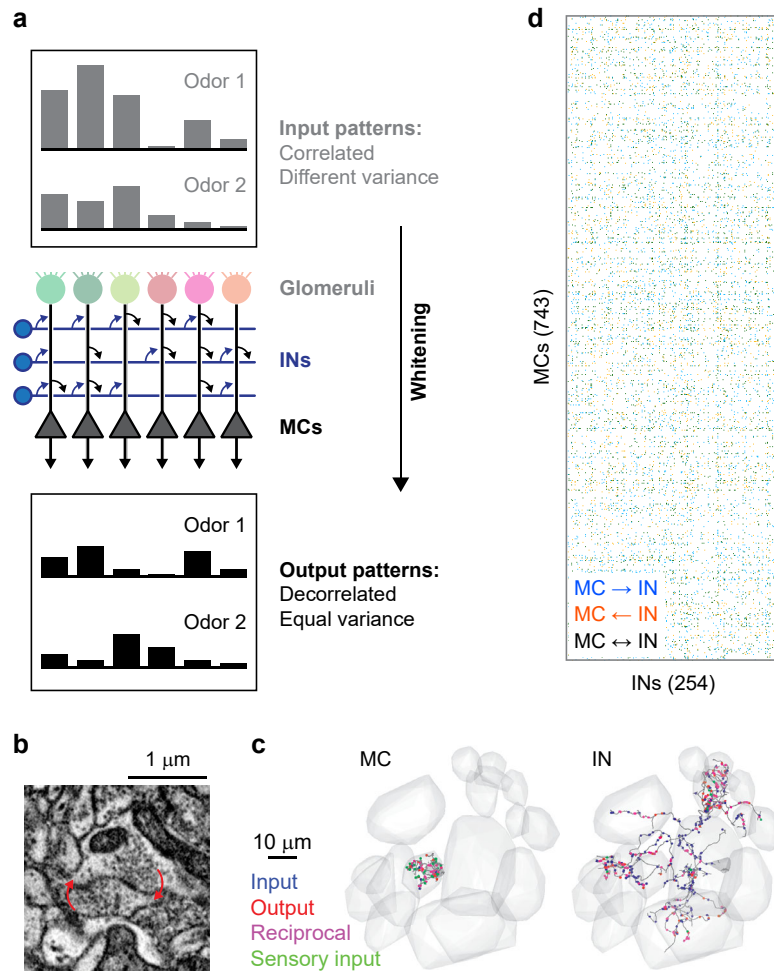

**Fig. 1 | Neuronal organization and computations in the OB.** **a**, Schematic illustration of whitening in the OB. Top: correlated input patterns with different variance. Bottom: decorrelated output patterns with similar variance. Center: Highly simplified illustration of the OB circuit. MCs receive excitatory input from a single glomerulus and interact via inhibitory INs. Whitening requires multisynaptic interactions between specific subsets of MCs that are mediated by INs and defined by the wiring diagram. **b**, Example of a reciprocal synapse between a MC and an IN. **c**, Reconstructions of a MC (left) and an IN (right). Gray volumes show glomeruli, dots depict synapses, colors denote synapse class (unidirectional non-sensory input [blue], unidirectional output [red], reciprocal [magenta], input from sensory neurons [green]). **d**, Simplified representation of the wiring diagram between MCs and INs (binarized connection strength). Colored matrix elements show MC $\rightarrow$ IN synapses (blue), MC $\leftarrow$ IN synapses (orange), and reciprocal synapses (black).

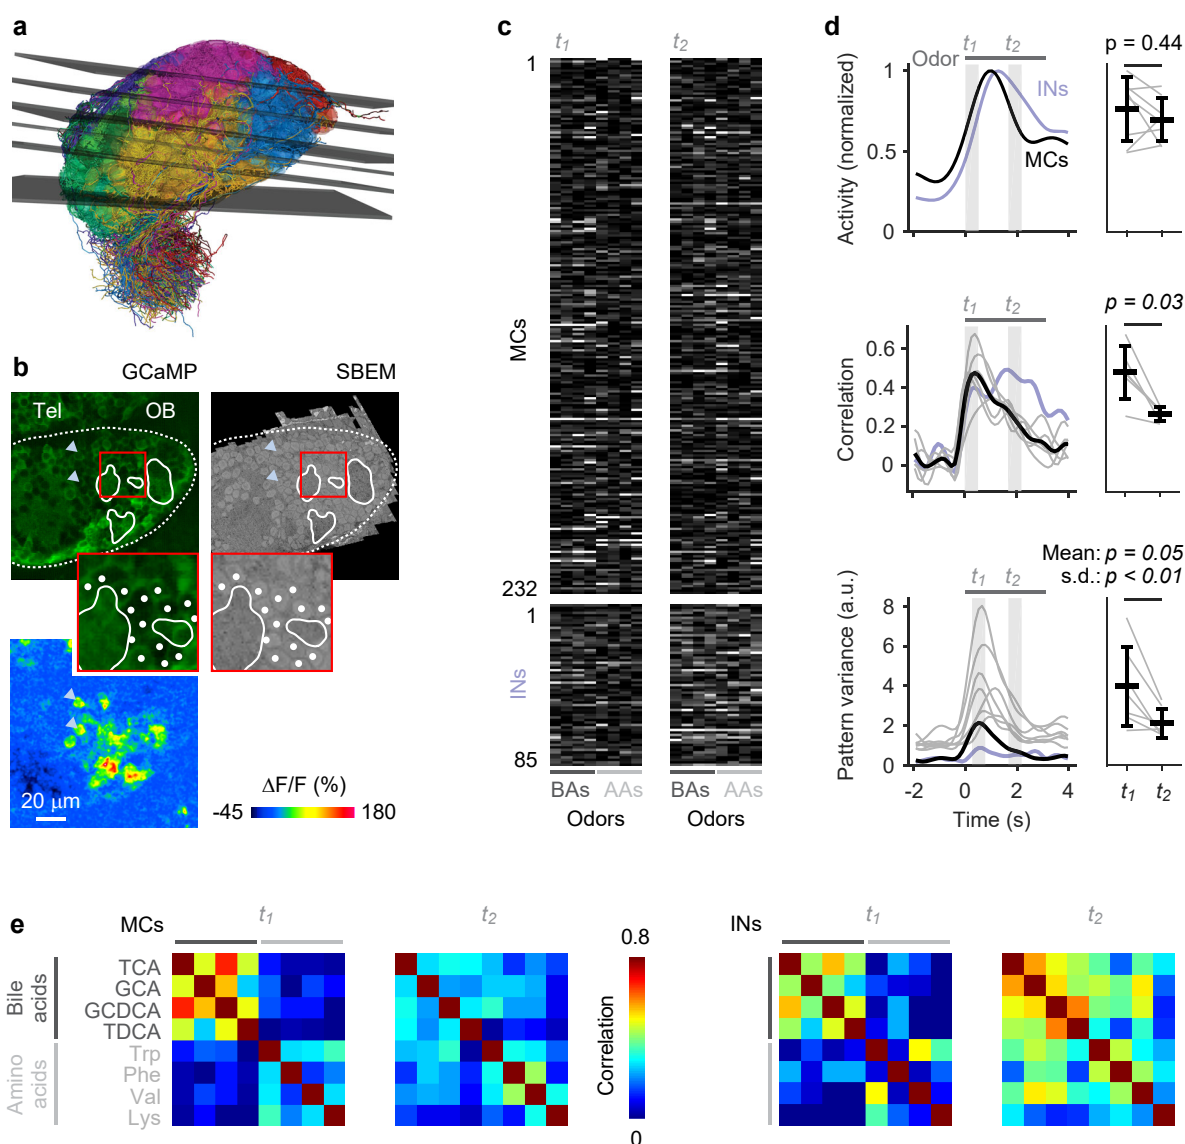

**Fig. 2 | Odor-evoked population activity in the OB.** **a**, Mapping of the six optical image planes selected for calcium imaging onto the EM-based reconstructions of neurons. Thickness of planes shows range of range of drift between trials. **b**, One optical image plane showing raw GCaMP5 fluorescence (left) and the corresponding oblique slice through the EM image stack (right). Dashed line outlines ipsilateral brain hemisphere; continuous white outlines show glomerular neuropil. Tel, telencephalon; OB, olfactory bulb. Region outlined by the red square is enlarged; white dots depict somata in corresponding locations. Bottom left: fluorescence change evoked by an odor stimulus in the same field of view. Arrowheads depict locations of two responsive somata in different images. **c**, Activity of MCs ( $n = 232$ ) and INs ( $n = 68$ ) in response to four bile acids (BAs) and four amino acids (AAs) during two time windows,  $t_1$  and  $t_2$ . **d**, Left: time courses of odor-evoked activity, pattern correlation (Pearson) and pattern variance. Horizontal bar indicates time of odor stimulation. Black: mean measures across MCs. Gray: individual odors (variance) or odor pairs (correlation). Light blue: mean measures across INs. Correlation was measured only between activity patterns evoked by bile acids because patterns evoked by amino acids were dissimilar already at response onset. Right: Mean measures for MCs during  $t_1$  and  $t_2$ . **e**, Matrices showing Pearson correlations between activity patterns across MCs (left) and INs (right) at  $t_1$  and  $t_2$ . Odors: TCA, taurocholic acid; GCA, glycocholic acid; GCDCA, glycochenodeoxycholic acid; TDCA, taurodeoxycholic acid; Trp, tryptophan; Phe, phenylalanine; Val, valine; Lys, lysine.

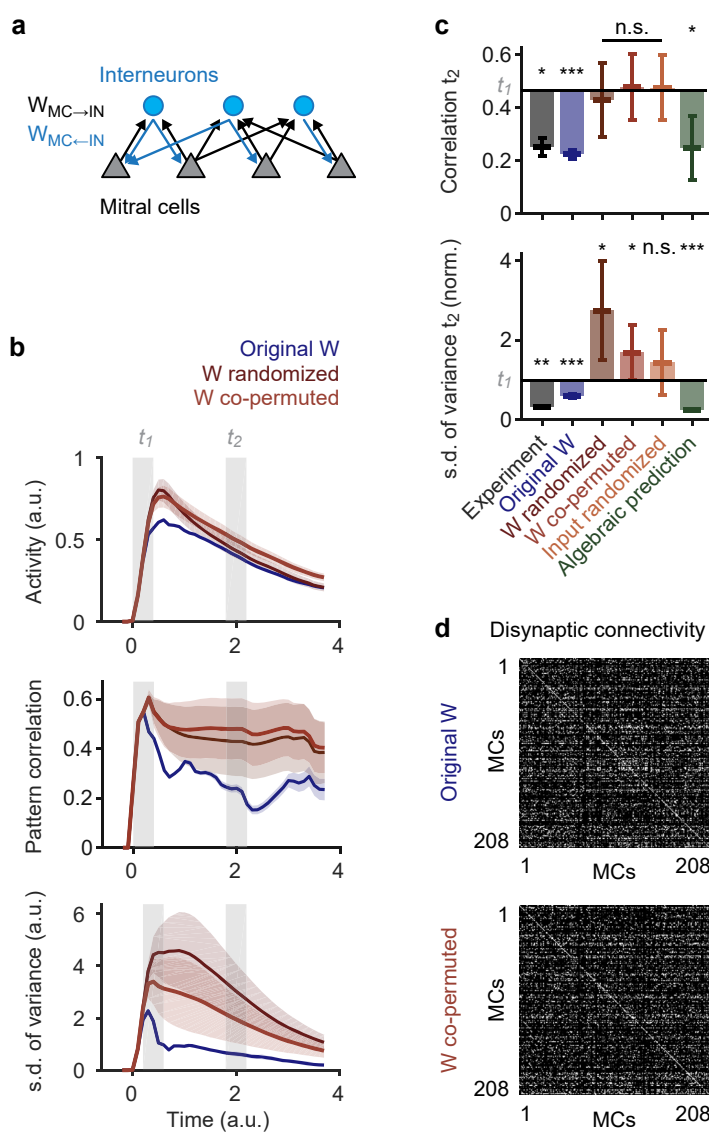

**Fig. 3 | Whitening depends on connectivity.** **a**, Architecture of simulated network with connections between MCs and INs. **b**, Time courses of simulated odor-evoked activity, pattern correlation and pattern variance obtained with different wiring diagrams. Blue: original wiring diagram obtained by circuit reconstruction. Dark red: fully randomized connectivity. Light red: co-permutation of feed-forward ( $MC \rightarrow IN$ ) and feed-back ( $MC \leftarrow IN$ ) connectivity. Shaded areas show s.d. across different permutations. **c**, Mean pattern correlation and s.d. of pattern variance at  $t_2$ . S.d. of pattern variance is normalized to the value observed experimentally at  $t_1$ . Horizontal black lines show mean experimental values at  $t_1$ . Statistical comparisons of correlation and s.d. of variance were performed using a Mann-Whitney U test and an F-test, respectively. For experimental results and simulations using the reconstructed wiring diagram error bars show s.d. across odor pairs (correlation; bile acids only) or individual odors (s.d. of variance). Significance tests compare values at  $t_2$  to experimental values at  $t_1$ . For other simulation results, error bars show s.d. over 20 repetitions. Significance tests compare the mean over repetitions to the mean observed experimentally at  $t_1$ . \*,  $p < 0.05$ ; \*\*,  $p < 0.01$ ; \*\*\*,  $p < 0.001$ ; n.s., not significant. **d**, Top: disynaptic connectivity matrix between MCs ( $W_{MC \rightarrow IN} * W_{MC \leftarrow IN}$ ). Grayscale represents number of disynaptic MC-IN-MC connections (normalized). Bottom: example of a disynaptic connectivity matrix with the same order of MCs after co-permuting  $W_{MC \rightarrow IN}$  and  $W_{MC \leftarrow IN}$ .



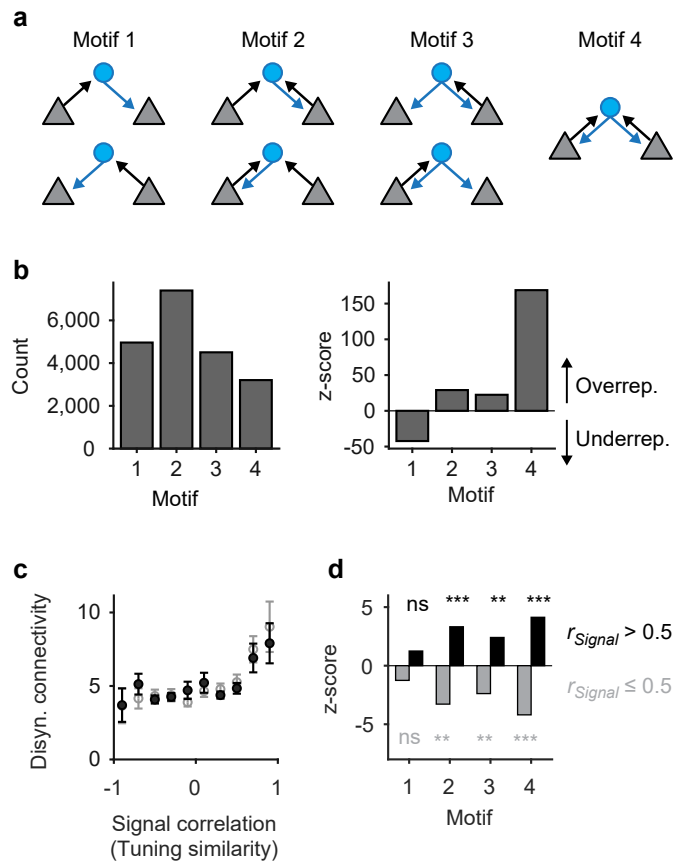

**Fig. 4 | Tuning-dependent disynaptic connectivity in the OB.** **a**, Classes of triplet connectivity motifs between MCs and INs. **b**, Left: number of connectivity motifs found in the wiring diagram (considering only MCs with activity measurements;  $n = 232$ ). Right: z-score quantifying over- or under-representation of motifs as compared to 10,000 independent randomizations. **c**, Number of disynaptic connections between MCs as a function of tuning similarity (signal correlation; binned; mean  $\pm$  s.e.m.). Black: all MCs ( $n = 21,528$  pairs); gray: excluding MCs without at least one strong odor response ( $n = 7,875$  pairs). **d**, Over- and under-representation of connectivity motifs among MC pairs with high signal correlation ( $r_{Signal} > 0.5$ ; black) and among the remaining pairs ( $r_{Signal} \leq 0.5$ ; gray).

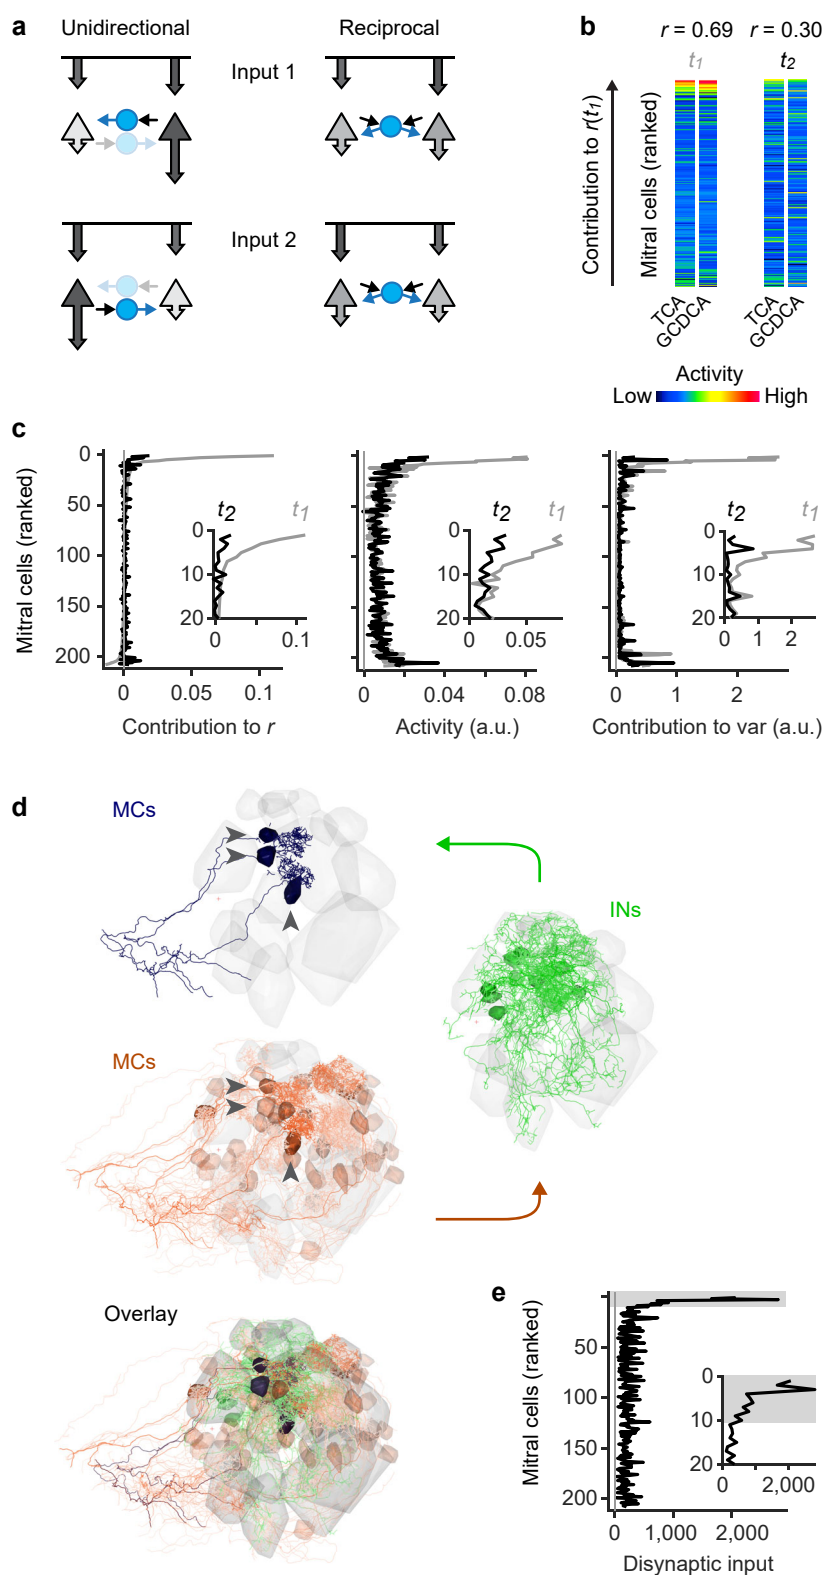

**Fig. 5 | Disynaptic connectivity underlying feature suppression.** **a**, Schematic illustration of contrast enhancement by unidirectional lateral inhibition (left) and down-scaling of cohort activity by reciprocal inhibition (right; feature suppression). Arrow length and grayscale indicate activity. **b**, Example of MC activity patterns evoked by two bile acids (TCA, GCDCA) that were decorrelated between  $t_1$  and  $t_2$ . MCs are ranked from top to bottom by their individual contribution to the pattern correlation  $r$  at  $t_1$  ( $r_{i,t1}$ ). **c**, Left: average contribution of MCs to all pairwise correlations between activity patterns evoked by bile acids at  $t_1$  and  $t_2$ . MCs were ranked by  $r_{i,t1}$  for each pair of patterns as in **b**. Sorted vectors of correlation contributions were then averaged over odor pairs. Center, right: Mean bile-acid evoked activity of MCs and mean contribution of MCs to pattern variance. MCs were sorted by  $r_{i,t1}$  and averaged as in the left panel. Gray and black curves show correlation contribution, activity, and variance contribution at  $t_1$  and  $t_2$ , respectively (same sorting of individual neurons by  $r_{i,t1}$  for all curves). Insets enlarge the top part of the curves (20 MCs with highest  $r_{i,t1}$ ). **d**, Example of disynaptic retrograde tracing of functional cohorts in the wiring diagram. Blue: three MCs with highest  $r_{i,t1}$  for the odor pair shown in **b** (“starter MCs”). Green: 12 INs with largest number of synaptic inputs to the starter MCs. Red: 48 MCs with largest number of disynaptic inputs to the starter MCs. Transparency represents the number of synaptic connections. Note that the MCs with strong disynaptic connectivity to the starter MCs include the starter MCs themselves, consistent with pronounced reciprocal connectivity among functionally related MC cohorts. **e**, Disynaptic MC-IN-MC connectivity as a function of correlation contribution at  $t_1$  ( $r_{i,t1}$ ; same ranking as in **b** and **c**). For each pair of bile acids, the 10 MCs with the highest  $r_{i,t1}$  were selected as starter cells. Disynaptic inputs from all MCs were then represented in a vector and averaged over odor pairs. Note strong overrepresentation of disynaptic connectivity within the cohort of starter cells (gray shading).

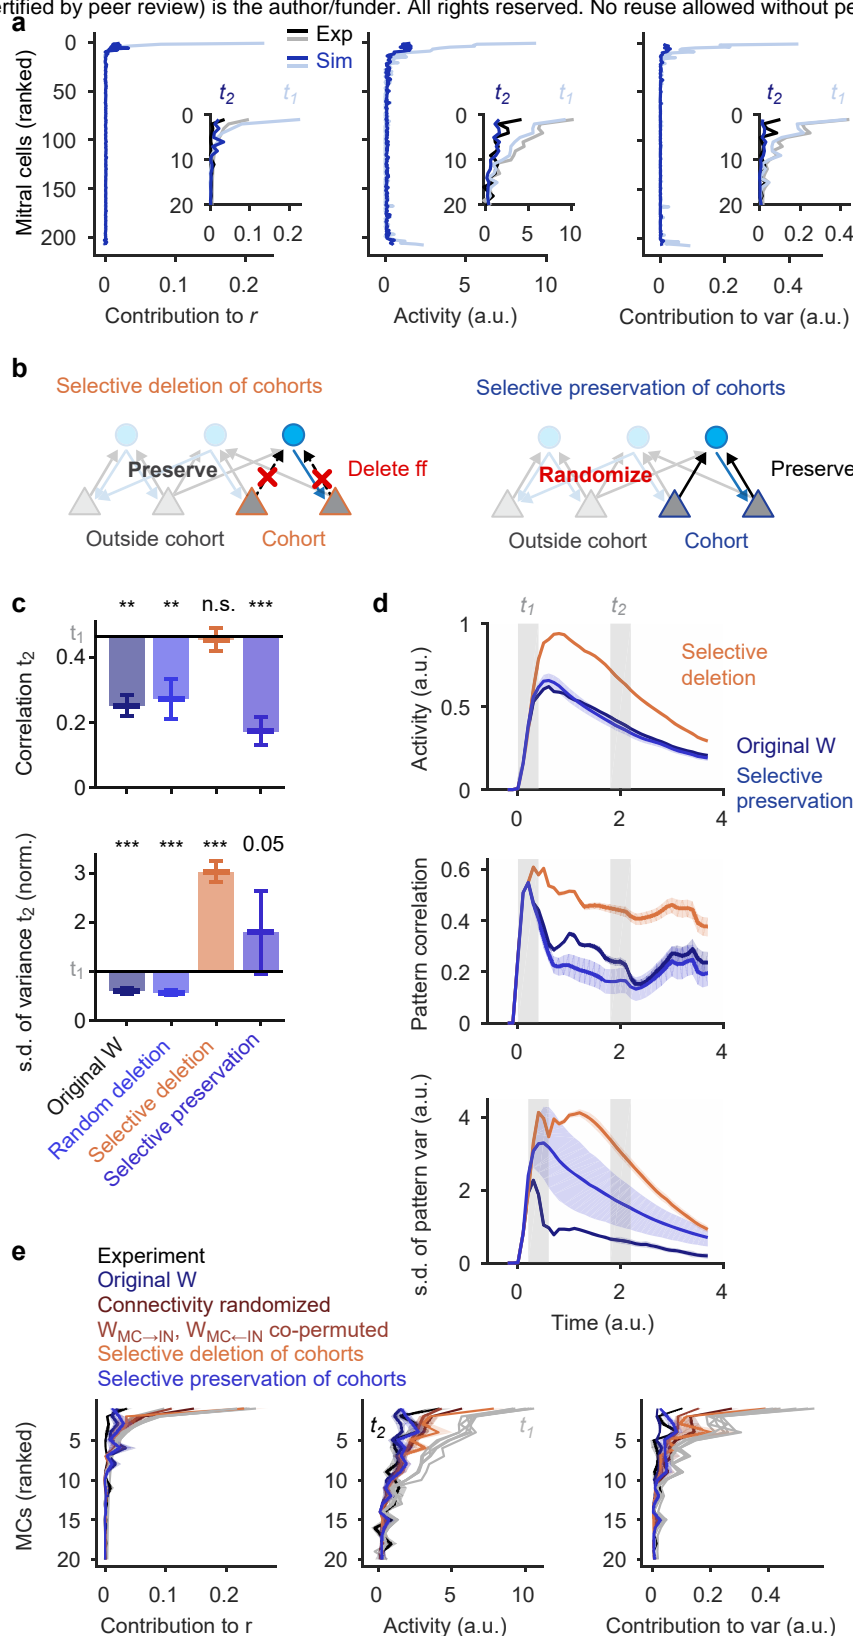

**Fig. 6 | Mechanism of whitening analyzed by targeted manipulations of the wiring diagram.** **a**, Mean correlation contribution, activity, and variance contribution of MCs responding to bile acids at  $t_1$  (light blue) and  $t_2$  (dark blue) in simulations. MCs were ranked by the correlation contribution  $r_{i,t}$  observed in experimental data as in Fig. 5c. Insets enlarge the top parts of the curves (20 MCs with highest  $r_{i,t}$ ) and compare simulation results to experimental data (gray, black) for the same 20 MCs. **b**, Schematic: selective deletion and selective preservation MC cohort connectivity in simulations. **c**, Mean pattern correlation and s.d. of pattern variance (normalized) at  $t_2$  observed in simulations under different conditions. S.d. of pattern variance has been normalized to the experimentally observed value at  $t_1$ . Horizontal black lines show mean values at  $t_1$ ; vertical bars show change relative to  $t_1$ . Statistical comparisons of correlation and s.d. of variance were performed using a Mann-Whitney test and an F-test, respectively. Error bars for original wiring diagram show s.d. across odor pairs (correlation; bile acids only) or individual odors (s.d. of variance); significance tests compare values at  $t_2$  to experimental values at  $t_1$ . Other error bars show s.d. over means from 20 simulations and significance tests compare the mean over repetitions to the mean observed experimentally at  $t_1$ . \*\*,  $p < 0.01$ ; \*\*\*,  $p < 0.001$ ; 0.05,  $p = 0.05$ ; n.s., not significant. **d**, Time courses of pattern correlation and of the s.d. of pattern variance in simulations using different wiring diagrams. Shaded area shows s.d. across different permutations. **e**, Mean correlation contribution, activity, and variance contribution of the 20 MCs with the highest  $r_{i,t}$  observed experimentally and in simulations using different wiring diagrams. MCs were ranked by  $r_{i,t}$  observed in experimental data as in **a** and in Fig. 5c (same ranking under all conditions). Gray:  $t_1$ ; Colored:  $t_2$ . Shading shows s.d. across 20 different permutations. Note that the reduction in correlation contribution, activity and variance contribution among MCs with high  $r_{i,t}$  is decreased when connectivity is modified globally or in functional cohorts, but not when connectivity of functional cohorts is preserved.

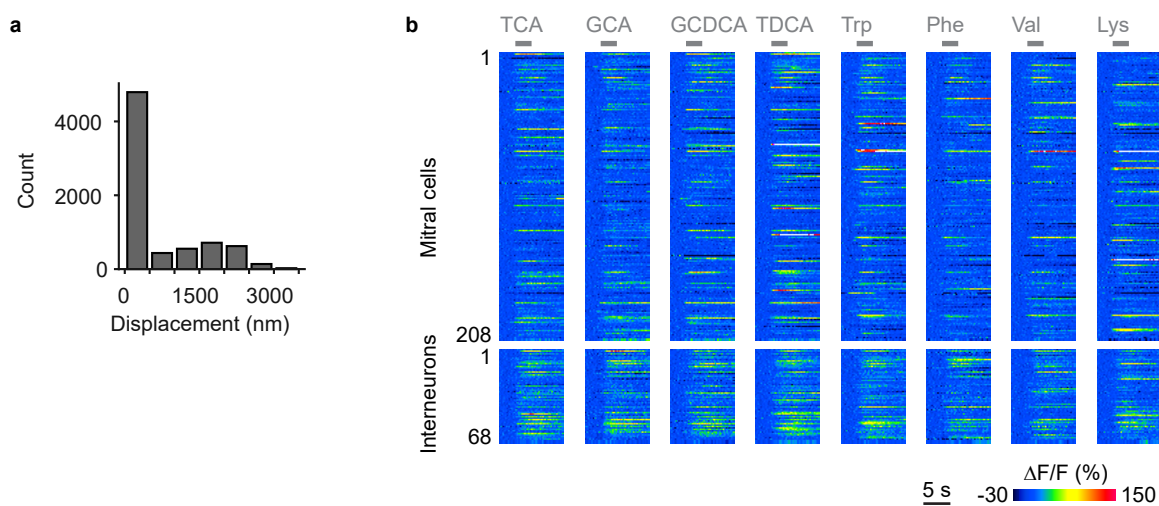

**Supplementary Fig. 1 | Mapping of datasets and activity measurements.** **a**, Displacement of regions of interest (ROIs) during manual proofreading. ROIs representing somata were mapped from the EM dataset to optical image planes in each trial by an affine transformation that was determined by an iterative landmark-based procedure (Methods). Subsequently, the position of each ROI was adjusted manually on the optical image ( $n = 7,280$  ROIs; six image planes with 11 trials each). The mean displacement ( $\pm$  s.d.) during manual adjustment (proofreading) was small ( $593 \pm 833$  nm), implying that automated mapping was highly reliable. **b**, Raw calcium signals ( $\Delta F/F$ ) evoked by eight odors in neurons that were present in all trials (208 MCs and 68 INs). Gray bars indicate odor stimulation.

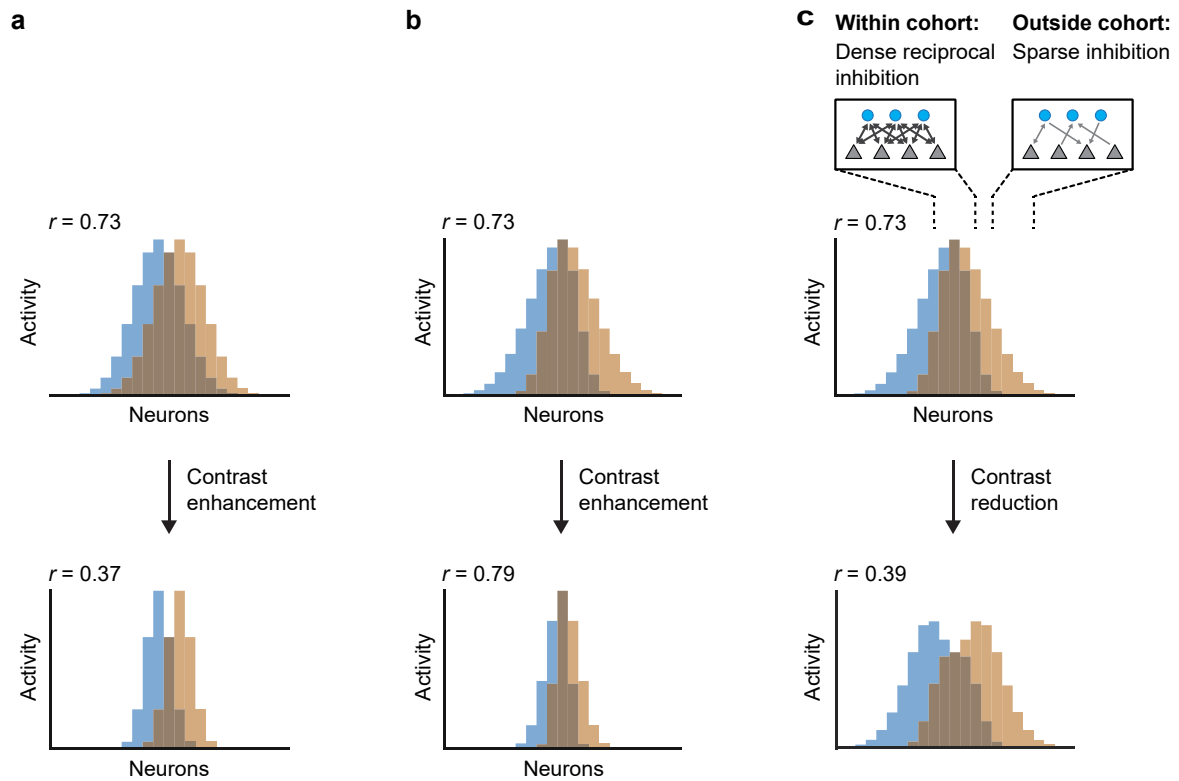

**Supplementary Fig.2 | Effects of pattern transformations on pattern correlation.** **a**, Effect of contrast enhancement on the correlation between displaced Gaussian patterns. In such patterns, strongly active units convey stimulus-specific information while weakly active units tend to be non-specific. Contrast enhancement therefore decorrelates patterns because it emphasizes strongly active units and suppresses weakly active units. **b**, Effect of contrast enhancement on the correlation between activity pattern that overlap in strongly active units. Contrast enhancement fails to decorrelate patterns because pattern-specific information is conveyed by moderately or weakly active units. **c**, Patterns that overlap in strongly active units are decorrelated by selective inhibition of strongly active units, which results in contrast reduction. Patterns are decorrelated because the relative contribution of moderately or weakly active units is enhanced. Selective inhibition of strongly active units is generated by dense reciprocal inhibition within cohorts of co-tuned neurons. Inhibitory feedback gain is therefore higher than the average inhibitory feedback gain within a co-tuned cohort when the stimulus feature that activates the cohort is present (feature suppression).
